# Supplementary material for: Genetic determinants of genus-level glycan diversity in a bacterial protein glycosylation system
Source: PubMed Central journal article supplement (PMC6959607; doi:10.1371/journal.pgen.1008532), 2019-12-23
Supplement: pgen.1008532.s010.pdf [file pgen.1008532.s010.pdf]

**S1 Table. Lists of strains and plasmids used in this study**

| Strain name                         | Relevant genotype                                       | Parent      | Reference           |
|-------------------------------------|---------------------------------------------------------|-------------|---------------------|
| KS100 ( <i>N. gonorrhoeae</i> N400) | <i>recA6</i>                                            | VD300       | [50]                |
| KS944                               | <i>N. elongata</i> subsp. <i>glycolytica</i> ATCC 29315 |             | lab collection [62] |
| <i>N. oralis</i> F0314              |                                                         |             | lab collection      |
| <i>N. cinerea</i> ATCC 14685        |                                                         |             | lab collection      |
| KS992                               | <i>nirK-His::cat</i>                                    | KS944       | [25]                |
| KS994                               | <i>nirK-His::cat pglC::kan</i>                          | KS992       | [25]                |
| KS1032                              | <i>nirK-His::cat pglP::kan</i>                          | KS992       | This study          |
| NK2259                              | Sm <sup>r</sup>                                         | KS944       | This study          |
| NW37                                | <i>nirK-His::cat</i> Sm <sup>r</sup>                    | NK2259      | This study          |
| NW154                               | <i>pglP::kan/rpsL+</i>                                  | NW37        | This study          |
| NW180                               | <i>pglP</i> <sub>S74-R148del</sub>                      | NW154       | This study          |
| NW270                               | <i>NELON_11105::kan</i>                                 | NW37        | This study          |
| NW182                               | <i>pglP</i> <sub><i>N. oralis</i></sub>                 | NW154       | This study          |
| NW212                               | <i>pglP</i> <sub><i>N. cinerea</i></sub>                | NW154       | This study          |
| NW254                               | <i>pglP</i> rescue                                      | NW154       | This study          |
|                                     |                                                         |             |                     |
| <b>Plasmid name</b>                 |                                                         |             |                     |
| pAK220                              | <i>NELON_11110</i>                                      | pCR2.1 TOPO | This study          |
| pAK227                              | <i>NELON_11110::kan</i>                                 | pAK220      | This study          |
| pKP79                               | pFLOB4300 <i>ermC::kan/rpsL+</i>                        | pFLOB4300   | This study          |
| pFLOB4300                           | <i>ermC</i> ' <i>rpsL+</i>                              |             | [51]                |
