# Supplementary material for: Genetic determinants of genus-level glycan diversity in a bacterial protein glycosylation system
Source: PubMed Central journal article supplement (PMC6959607; doi:10.1371/journal.pgen.1008532), 2019-12-23
Supplement: pgen.1008532.s011.pdf [file pgen.1008532.s011.pdf]

## S2 Table

### PCR oligonucleotide primers

| Primer name | Sequence (5'-3')                             |
|-------------|----------------------------------------------|
| av2934      | GGTCGCCGATGGTGTTC AAGTGG                     |
| av2935      | GCAGCAGGAATACGCGCCGGTTC                      |
| nw92        | CAGACGGCCTGAAGTACG                           |
| nw94        | GAAATTGTTATCCGCTTATCGGTTATTCCTTGTTTT<br>CAG  |
| nw95        | CAAGGAATAACCGATAAGCGGATAACAATTT CACA<br>CAGG |
| nw96        | CTGAAAGCTTTATCCAGTCACGACGTTGTAAAAC           |
| nw97        | CGTCGTGACTGGGATAAAGCTTTCAGGCGGCC             |
| nw98        | GAGGAATACGATGCTGAAC                          |
| nw111       | TAAACATGCATTATCGGTTATTCCTTGTTTTC             |
| nw112       | GAATAACCGATAATGCATGTTTTAATCATCCC             |
| nw113       | GAAAGCTTTATCTAACTTTCATGGGTTCTCCGAG<br>TATTG  |
| nw114       | CATGAAAGTTAGATAAAGCTTTCAGGCGGC               |
| nw122       | CCGGTGAAATAGATAAAGCTTTCAGGCGGC               |
| nw152       | CGGTTCCGACATTATCGGTTATTCCTTGTTTTC            |
| nw153       | CCTGATTAAGCTGTGGCGCGTATAGGTGG                |
| nw154       | GCGCCACAGCTTAATCAGGCCGTGGCAG                 |
| nw180       | CGGCATTCAAATAAGTGAG                          |
| nw181       | GATGTTACATTGCACGCTACGGCTTTGAGACA             |
| nw184       | CGGTATCGATAAGCGCTGTATTGAAACGGCAG             |
| nw185       | GCACCACATAATTCAGCA                           |
| nw188       | TCAAAGCCGTAGC CTCTGATGTTACATTGCAC            |
| nw189       | GCCGTTTCAATACAGCCGACGGTATCGATAAGC            |
