# Supplementary material for: Genetic determinants of genus-level glycan diversity in a bacterial protein glycosylation system
Source: PubMed Central journal article supplement (PMC6959607; doi:10.1371/journal.pgen.1008532), 2019-12-23
Supplement: pgen.1008532.s012.pdf [file pgen.1008532.s012.pdf]

### S3 Table

Pgl protein / gene sequences used in iterative BLASTP and BLASTN queries

| <i>pgl</i> gene        | function*                                                                     | <i>N. gonorrhoeae</i><br>(FA1090)          | <i>N. elongata</i> sp.<br><i>glycolytica</i><br>(ATCC 29315) | PubMLST<br>locus<br>designation |
|------------------------|-------------------------------------------------------------------------------|--------------------------------------------|--------------------------------------------------------------|---------------------------------|
| <i>pglF</i>            | und-PP-glycan flippase                                                        | Q5FAD8<br>ngo0088                          | <u>D4DSY1</u><br>Nelon_11115                                 | NEIS0402                        |
| <i>pglG</i>            | glycosyltransferase                                                           | Q5FAD9<br>ngo0087                          | <u>D4DNG4</u><br>Nelon_10535                                 | NEIS0401                        |
| <i>pglH</i>            | glycosyltransferase                                                           | Q5FAE0<br>ngo0086                          | A0A0B5CSK6<br>Nelon_10545                                    | NEIS0400                        |
| <i>pglB</i>            | N-acetyltransferase /<br>phosphoglycosyl<br>transferase                       | Q5FAE1<br>ngo0085                          | D4DQH0/D4D<br>QH1#<br>Nelon_10565/<br>Nelon_10570#           | NEIS2839/<br>NEIS2840           |
| <i>pglC</i>            | aminotransferase                                                              | Q5FAE2<br>ngo0084                          | D4DQH2<br>Nelon_10575                                        | NEIS0379                        |
| <i>pglD</i>            | NAD <sup>+</sup> -dependent<br>dehydratase                                    | Q5FAE3<br>ngo0083                          | A0A0B5CN10<br>Nelon_02985                                    | NEIS0396                        |
| <i>pglA</i>            | glycosyltransferase                                                           | Q5F602<br>ngo1765                          | -                                                            | NEIS0213                        |
| <i>pglE</i>            | glycosyltransferase                                                           | Q5FA27<br>ngo0207                          | -                                                            | NEIS0568                        |
| <i>pglP</i>            | glycosyltransferase                                                           | pseudogene                                 | D4DSY2<br>Nelon_11110                                        | NEIS2841                        |
| <i>pglJ</i>            | UDP-GlcNAc(3NAc)A<br>biosynthesis – 1 <sup>st</sup> step<br>C6-oxidase        | -                                          | A0A0B5CJR7<br>Nelon_10580                                    | NEIS2842                        |
| <i>pglK</i>            | UDP-GlcNAc(3NAc)A<br>biosynthesis – 2 <sup>nd</sup> step<br>C3-dehydrogenase  | -                                          | D4DQH5<br>Nelon_10585                                        | NEIS2843                        |
| <i>pglM</i>            | UDP-GlcNAc(3NAc)A<br>biosynthesis – 3 <sup>rd</sup> step<br>aminotransferase  | -                                          | A0A0B5CHH6<br>Nelon_05890                                    | NEIS2844                        |
| <i>pglN</i>            | UDP-GlcNAc(3NAc)A<br>biosynthesis – 4 <sup>th</sup> step<br>acetyltransferase | -                                          | D4DNJ5<br>Nelon_05885                                        | NEIS2845                        |
| <i>pglB2</i>           | glyceramidotransferase /<br>phosphoglycosyl<br>transferase                    | Q93TW2<br><i>N. meningitidis</i><br>053442 | -                                                            | NEIS2838                        |
| $\Delta$ <i>pglG/H</i> | conserved deletion<br><i>pglG</i> 3' / <i>pglH</i> 5'                         | NA                                         | NA                                                           | NEIS2473                        |

- gene not present

\* see Fig. 2 for details

# two (split) - ORF configuration
