# Supplementary material for: Genetic determinants of genus-level glycan diversity in a bacterial protein glycosylation system
Source: PubMed Central journal article supplement (PMC6959607; doi:10.1371/journal.pgen.1008532), 2019-12-23
Supplement: pgen.1008532.s013.pdf [file pgen.1008532.s013.pdf]

## Oligonucleotide Sequences used to Assess *pgIP* Pseudogene Mutation Distribution

*N. gonorrhoeae* *pgIP* ORF-disrupting polymorphisms / SNVs (coding strand):

fs84 ( TTTCTT**CCCCG**CTTTCCGTTTATC ) - insertion of C (3C to 4C) relative to WT

ns207 ( CAAACATTTGAA**T**AAAAAGAAAA ) - replacement of A by T (stop codon generated)

fs387 ( TTCCGTCAGGCG**GCGC**GGAACACGG ) - insertion of GC relative to WT

*N. meningitidis* *pgIP* ORF-disrupting polymorphisms / SNVs and CREE insertions (coding strand):

fs25 ( ACGGGAT**TTTTTTT**CAAAAT ) - deletion of T (8T to 7T) relative to WT

fs60 ( CCTGACCGG**CCTT**ACGGTTT ) - deletion of C (3C to 2C) relative to WT

CREE67 ( GACCCTTACGGTTTTGCAAA**ATATAGTGGATTAA** ) - CREE sequence + AT

fs195 ( ATGGCAGTACCT**CCCCC**AAACATA ) - insertion of C (4C to 5C) relative to WT

fs211 ( CAAAGAG**AAAAAAAAA**CAACAAACCG ) - insertion of A (7A to 8A) relative to WT

CREEstop ( GCAATCGCAGAATACGGTAAGAAAATACCGGTGAA**ATATAGTGGATTAA**CAAAAATCAG  
**GACAAGGCAAC** ) – CREE sequence + AT
