# Supplementary material for: Genetic determinants of genus-level glycan diversity in a bacterial protein glycosylation system
Source: PLoS Genet. 2019 Dec 23;15(12):e1008532. doi: 10.1371/journal.pgen.1008532 (PMC6959607; doi:10.1371/journal.pgen.1008532)
Supplement: S4 Dataset — Table shows strain name, date and country of isolation, serogroup, as well as sequence type and clonal complex designation. Colored cells indicate the presence of ORF–disrupting SNVs or CREE insertions (see Fig 6 for details). ID numbers are derived from the Neisseria PubMLST database. (XLSX) [file pgen.1008532.s017.xlsx]

## Sheet: Sheet1
Isolate id	Isolate	country	year	serogroup	ST (MLST)	clonal complex (MLST)	fs25	fs60	CREE 67	fs195	fs211	CREEstop
20016	M10 240607	UK	2010	C	5133	ST-103
20079	M10 240705	UK	2010	C	5133	ST-103
20244	M11 240094	UK	2011	C	5133	ST-103
20248	M11 240100	UK	2011	B	9239	ST-103
20397	M11 240347	UK	2011	C	5133	ST-103
21199	M11 240789	UK	2011	B	103	ST-103
21417	M12 240200	UK	2012	C	5133	ST-103
21505	M12 240332	UK	2012	Y	5987	ST-103
28060	M13 240448	UK	2013	B	103	ST-103
28067	M13 240458	UK	2013	B	103	ST-103
28079	M12 240345	UK	2012	C	5133	ST-103
28101	M13 240398	UK	2013	C	5133	ST-103
28176	M12 240748	UK	2012	Y	103	ST-103
35259	09.2935.B	UK	2009	B	103	ST-103
35289	10.2631.L	UK	2010	Z	103	ST-103
35329	12.1092.Y	UK	2012	B	103	ST-103
35528	M13 240740	UK	2013	B	8023	ST-103
35551	M14 240020	UK	2014	C	5133	ST-103
37832	M15 240053	UK	2015	B	103	ST-103
39414	M15 240801	UK	2015	B	103	ST-103
42566	M16 240129	UK	2016	C	12020	ST-103
44709	M16 240220	UK	2016	C	5133	ST-103
47321	M16 240649	UK	2016	B	5133	ST-103
19968	M10 240514	UK	2010	W	11	ST-11
20057	M10 240671	UK	2010	W	11	ST-11
20066	M10 240684	UK	2010	B	11	ST-11
20154	M10 240817	UK	2010	W	11	ST-11
20155	M10 240818	UK	2010	C	11	ST-11
20158	M10 240821	UK	2010	W	11	ST-11
20196	M11 240035	UK	2011	W	11	ST-11
20215	M11 240056	UK	2011	B	11	ST-11
20216	M11 240057	UK	2011	W	11	ST-11
20226	M11 240067	UK	2011	W	11	ST-11
20234	M11 240076	UK	2011	C	11	ST-11
20247	M11 240099	UK	2011	W	11	ST-11
20261	M11 240123	UK	2011	B	3537	ST-11
20288	M11 240168	UK	2011	W	11	ST-11
20329	M11 240247	UK	2011	C	11	ST-11
20359	M11 240294	UK	2011	C	11	ST-11
20368	M11 240305	UK	2011	W	11	ST-11
20424	M11 240389	UK	2011	W	11	ST-11
20436	M11 240403	UK	2011	W	11	ST-11
20444	M11 240417	UK	2011	W	11	ST-11
20449	M11 240427	UK	2011	W	11	ST-11
20460	M12 240156	UK	2012	W	11	ST-11
20461	M12 240160	UK	2012	W	11	ST-11
21110	M11 240469	UK	2011	B	10260	ST-11
21123	M11 240486	UK	2011	W	1860	ST-11
21134	M11 240502	UK	2011	C	11	ST-11
21163	M11 240726	UK	2011	W	11	ST-11
21196	M11 240785	UK	2011	C	11	ST-11
21203	M11 240798	UK	2011	W	11	ST-11
21206	M11 240802	UK	2011	W	11	ST-11
21208	M11 240941	UK	2011	C	11	ST-11
21214	M11 240953	UK	2011	W	11	ST-11
21216	M11 240975	UK	2011	W	11	ST-11
21232	M11 240994	UK	2011	C	11	ST-11
21237	M11 241016	UK	2011	B	11	ST-11
21253	M11 241039	UK	2011	C	11	ST-11
21256	M11 241043	UK	2011	C	11	ST-11
21288	M12 240004	UK	2012	W	11	ST-11
21298	M12 240016	UK	2012	W	11	ST-11
21302	M12 240021	UK	2012	W	11	ST-11
21305	M12 240027	UK	2012	W	11	ST-11
21311	M12 240033	UK	2012	B	11	ST-11
21330	M12 240061	UK	2012	B	11	ST-11
21334	M12 240067	UK	2012	W	11	ST-11
21335	M12 240069	UK	2012	B	11	ST-11
21354	M12 240095	UK	2012	W	11	ST-11
21359	M12 240101	UK	2012	C	11	ST-11
21361	M12 240104	UK	2012	NG	11	ST-11
21364	M12 240111	UK	2012	C	11	ST-11
21375	M12 240125	UK	2012	W	11	ST-11
21377	M12 240127	UK	2012	W	11	ST-11
21381	M12 240133	UK	2012	W	11	ST-11
21386	M12 240144	UK	2012	W	10284	ST-11
21407	M12 240177	UK	2012	C	11	ST-11
21419	M12 240202	UK	2012	C	11	ST-11
21446	M12 240240	UK	2012	W	11	ST-11
21458	M12 240255	UK	2012	C	11	ST-11
21492	M12 240317	UK	2012	W	11	ST-11
21499	M12 240324	UK	2012	W	11	ST-11
26732	M13 240559	UK	2013	C	11	ST-11
27803	M12 240682	UK	2012	B	11	ST-11
27992	M13 240199	UK	2013	B	11	ST-11
28080	M12 240639	UK	2012	C	11	ST-11
28082	M12 240679	UK	2012	C	11	ST-11
28083	M12 240698	UK	2012	C	11	ST-11
28084	M12 240716	UK	2012	C	11	ST-11
28085	M12 240776	UK	2012	C	11	ST-11
28089	M13 240008	UK	2013	C	11	ST-11
28090	M13 240022	UK	2013	C	11	ST-11
28092	M13 240068	UK	2013	C	11	ST-11
28093	M13 240155	UK	2013	C	11	ST-11
28094	M13 240162	UK	2013	C	11	ST-11
28095	M13 240189	UK	2013	C	11	ST-11
28097	M13 240254	UK	2013	C	11	ST-11
28098	M13 240280	UK	2013	C	11	ST-11
28099	M13 240282	UK	2013	C	11	ST-11
28100	M13 240295	UK	2013	C	11	ST-11
28102	M13 240401	UK	2013	C	11	ST-11
28103	M13 240402	UK	2013	C	11	ST-11
28104	M13 240405	UK	2013	C	11	ST-11
28105	M13 240440	UK	2013	C	11	ST-11
28106	M13 240460	UK	2013	C	11	ST-11
28114	M12 240337	UK	2012	W	11	ST-11
28115	M12 240640	UK	2012	W	11	ST-11
28116	M12 240657	UK	2012	W	11	ST-11
28117	M12 240663	UK	2012	W	11	ST-11
28119	M12 240702	UK	2012	W	11	ST-11
28121	M12 240751	UK	2012	W	10651	ST-11
28122	M12 240754	UK	2012	W	11	ST-11
28125	M12 240774	UK	2012	W	11	ST-11
28128	M12 240826	UK	2012	W	11	ST-11
28131	M12 240895	UK	2012	W	11	ST-11
28132	M12 240898	UK	2012	W	11	ST-11
28134	M13 240015	UK	2013	W	11	ST-11
28135	M13 240025	UK	2013	W	11	ST-11
28136	M13 240028	UK	2013	W	11	ST-11
28137	M13 240056	UK	2013	W	11	ST-11
28138	M13 240066	UK	2013	W	11	ST-11
28139	M13 240077	UK	2013	W	10651	ST-11
28141	M13 240109	UK	2013	W	11	ST-11
28142	M13 240114	UK	2013	W	11	ST-11
28143	M13 240158	UK	2013	W	11	ST-11
28144	M13 240168	UK	2013	W	11	ST-11
28146	M13 240185	UK	2013	W	10651	ST-11
28147	M13 240223	UK	2013	W	11	ST-11
28148	M13 240225	UK	2013	W	10651	ST-11
28149	M13 240238	UK	2013	W	11	ST-11
28150	M13 240246	UK	2013	W	11	ST-11
28151	M13 240247	UK	2013	W	11	ST-11
28152	M13 240251	UK	2013	W	11	ST-11
28153	M13 240269	UK	2013	W	11	ST-11
28154	M13 240283	UK	2013	W	11	ST-11
28156	M13 240436	UK	2013	W	11	ST-11
28157	M13 240446	UK	2013	W	11	ST-11
28158	M13 240457	UK	2013	W	11	ST-11
28159	M13 240464	UK	2013	W	11	ST-11
28161	M13 240467	UK	2013	W	11	ST-11
28162	M13 240469	UK	2013	W	11	ST-11
28163	M13 240473	UK	2013	W	11	ST-11
28164	M13 240482	UK	2013	W	11	ST-11
29721	M13 240491	UK	2013	W	11	ST-11
29723	M13 240555	UK	2013	W	11	ST-11
29724	M13 240591	UK	2013	W	11	ST-11
29725	M13 240603	UK	2013	W	11	ST-11
29726	M13 240604	UK	2013	W	10651	ST-11
29727	M13 240545	UK	2013	W	11	ST-11
29728	M13 240558	UK	2013	W	11	ST-11
29729	M13 240594	UK	2013	W	11	ST-11
29730	M13 240583	UK	2013	W	11161	ST-11
29731	M13 240510	UK	2013	W	11	ST-11
29732	M13 240633	UK	2013	W	11	ST-11
29733	M13 240634	UK	2013	W	11	ST-11
29734	M13 240538	UK	2013	W	11	ST-11
29735	M13 240515	UK	2013	W	11	ST-11
29736	M13 240600	UK	2013	W	11	ST-11
29737	M13 240553	UK	2013	W	11	ST-11
29895	M13 240496	UK	2013	C	11	ST-11
29897	M13 240500	UK	2013	C	11	ST-11
29898	M13 240514	UK	2013	C	11	ST-11
30136	M13 240635	UK	2013	W	11	ST-11
30137	M13 240637	UK	2013	W	11	ST-11
30138	M13 240649	UK	2013	W	11	ST-11
30139	M13 240655	UK	2013	W	11	ST-11
30140	M13 240657	UK	2013	W	11	ST-11
30141	M13 240664	UK	2013	W	11	ST-11
30143	M13 240667	UK	2013	W	11	ST-11
30144	M13 240668	UK	2013	W	11	ST-11
30145	M13 240672	UK	2013	W	11	ST-11
30146	M13 240678	UK	2013	W	11	ST-11
30147	M13 240680	UK	2013	W	11	ST-11
30148	M13 240681	UK	2013	W	11	ST-11
30150	M13 240724	UK	2013	W	11	ST-11
30151	M13 240726	UK	2013	W	11	ST-11
30152	M13 240730	UK	2013	W	11	ST-11
30153	M13 240732	UK	2013	W	11	ST-11
30154	M14 240001	UK	2014	W	11	ST-11
30155	M14 240002	UK	2014	W	11	ST-11
30156	M14 240007	UK	2014	W	11	ST-11
30157	M14 240013	UK	2014	W	11	ST-11
30158	M14 240019	UK	2014	W	11	ST-11
30159	M14 240022	UK	2014	W	8621	ST-11
30160	M14 240026	UK	2014	W	11	ST-11
30161	M14 240029	UK	2014	W	11	ST-11
30162	M14 240031	UK	2014	W	11	ST-11
30163	M14 240042	UK	2014	W	11	ST-11
30164	M14 240043	UK	2014	W	11	ST-11
30165	M14 240052	UK	2014	W	11	ST-11
30166	M14 240053	UK	2014	W	10651	ST-11
30167	M14 240054	UK	2014	W	11	ST-11
30168	M14 240072	UK	2014	W	11	ST-11
30169	M14 240082	UK	2014	W	11	ST-11
30210	M13 240691	UK	2013	C	11	ST-11
30214	M14 240100	UK	2014	C	11	ST-11
30215	M14 240107	UK	2014	C	11	ST-11
31162	M14 240329	UK	2014	B	11	ST-11
31168	M14 240447	UK	2014	W	11	ST-11
31169	M14 240448	UK	2014	W	11	ST-11
35371	12.7350.H	UK	2012	W	11	ST-11
35397	13.8552.X	UK	2013	W	11	ST-11
35425	M13 240531	UK	2013	W	11	ST-11
35500	M13 240695	UK	2013	B	11	ST-11
35502	M13 240697	UK	2013	B	11	ST-11
35507	M13 240705	UK	2013	W	11	ST-11
35581	M14 240090	UK	2014	W	11	ST-11
35598	M14 240116	UK	2014	W	11	ST-11
35608	M14 240126	UK	2014	W	11	ST-11
35614	M14 240135	UK	2014	W	11	ST-11
35618	M14 240142	UK	2014	W	11	ST-11
35621	M14 240145	UK	2014	W	11	ST-11
35622	M14 240147	UK	2014	W	11	ST-11
35624	M14 240150	UK	2014	W	11	ST-11
35628	M14 240168	UK	2014	C	11	ST-11
35632	M14 240178	UK	2014	W	11	ST-11
35634	M14 240180	UK	2014	W	11	ST-11
35635	M14 240199	UK	2014	W	11	ST-11
35638	M14 240204	UK	2014	W	11	ST-11
35643	M14 240211	UK	2014	W	11	ST-11
35650	M14 240222	UK	2014	C	11	ST-11
35651	M14 240223	UK	2014	W	11	ST-11
35659	M14 240236	UK	2014	C	10482	ST-11
35664	M14 240245	UK	2014	W	11292	ST-11
35667	M14 240249	UK	2014	B	11	ST-11
35670	M14 240253	UK	2014	W	11	ST-11
35672	M14 240255	UK	2014	C	11	ST-11
35674	M14 240257	UK	2014	W	11	ST-11
35675	M14 240258	UK	2014	W	11	ST-11
35686	M14 240278	UK	2014	W	11	ST-11
35687	M14 240279	UK	2014	W	10651	ST-11
35688	M14 240280	UK	2014	C	11	ST-11
35689	M14 240282	UK	2014	W	11	ST-11
35690	M14 240283	UK	2014	W	11	ST-11
35693	M14 240286	UK	2014	C	11	ST-11
35700	M14 240299	UK	2014	W	10651	ST-11
35702	M14 240304	UK	2014	W	11	ST-11
35706	M14 240310	UK	2014	C	11	ST-11
35722	M14 240337	UK	2014	W	11	ST-11
35725	M14 240343	UK	2014	W	11	ST-11
35728	M14 240346	UK	2014	W	11	ST-11
35731	M14 240351	UK	2014	W	11	ST-11
35754	M14 240389	UK	2014	W	11	ST-11
35756	M14 240391	UK	2014	W	11	ST-11
35762	M14 240405	UK	2014	C	11	ST-11
35763	M14 240406	UK	2014	W	11	ST-11
35775	M14 240436	UK	2014	C	11	ST-11
35782	M14 240463	UK	2014	W	11	ST-11
35786	M14 240468	UK	2014	W	11	ST-11
35788	M14 240470	UK	2014	W	11	ST-11
35792	M14 240474	UK	2014	W	11	ST-11
35796	M14 240478	UK	2014	W	11	ST-11
35799	M14 240482	UK	2014	W	11	ST-11
35800	M14 240485	UK	2014	W	11	ST-11
35801	M14 240486	UK	2014	W	11	ST-11
35807	M14 240492	UK	2014	W	10651	ST-11
35808	M14 240494	UK	2014	W	11	ST-11
35809	M14 240495	UK	2014	W	11	ST-11
35810	M14 240496	UK	2014	W	11	ST-11
35811	M14 240500	UK	2014	W	11	ST-11
37668	M14 240229	UK	2014	C	11	ST-11
37670	M14 240394	UK	2014	W	11	ST-11
37673	M14 240502	UK	2014	W	10651	ST-11
37675	M14 240504	UK	2014	W	10651	ST-11
37679	M14 240509	UK	2014	C	11	ST-11
37681	M14 240511	UK	2014	W	11	ST-11
37685	M14 240517	UK	2014	W	11	ST-11
37690	M14 240522	UK	2014	W	11	ST-11
37692	M14 240524	UK	2014	W	11	ST-11
37693	M14 240525	UK	2014	W	11	ST-11
37699	M14 240532	UK	2014	W	11	ST-11
37701	M14 240534	UK	2014	W	11	ST-11
37708	M14 240545	UK	2014	W	11	ST-11
37709	M14 240546	UK	2014	C	11	ST-11
37710	M14 240548	UK	2014	W	11	ST-11
37711	M14 240550	UK	2014	W	11	ST-11
37716	M14 240555	UK	2014	W	11	ST-11
37717	M14 240556	UK	2014	W	11	ST-11
37722	M14 240562	UK	2014	W	11	ST-11
37728	M14 240568	UK	2014	C	11	ST-11
37730	M14 240572	UK	2014	W	11	ST-11
37731	M14 240573	UK	2014	W	11	ST-11
37732	M14 240574	UK	2014	W	11	ST-11
37736	M14 240581	UK	2014	W	11	ST-11
37738	M14 240585	UK	2014	W	10651	ST-11
37739	M14 240587	UK	2014	W	11	ST-11
37742	M14 240593	UK	2014	W	11	ST-11
37746	M14 240601	UK	2014	W	11867	ST-11
37747	M14 240602	UK	2014	W	11	ST-11
37748	M14 240604	UK	2014	W	11	ST-11
37749	M14 240605	UK	2014	W	10651	ST-11
37752	M14 240616	UK	2014	C	11	ST-11
37754	M14 240618	UK	2014	W	11	ST-11
37757	M14 240621	UK	2014	W	11	ST-11
37758	M14 240622	UK	2014	C	11	ST-11
37760	M14 240624	UK	2014	W	11	ST-11
37763	M14 240627	UK	2014	C	11	ST-11
37764	M14 240628	UK	2014	W	11	ST-11
37769	M14 240633	UK	2014	W	11	ST-11
37770	M14 240634	UK	2014	W	11	ST-11
37774	M14 240638	UK	2014	W	11	ST-11
37784	M14 240649	UK	2014	W	11	ST-11
37787	M14 240652	UK	2014	C	11	ST-11
37793	M15 240005	UK	2015	W	11	ST-11
37797	M15 240010	UK	2015	W	11	ST-11
37798	M15 240011	UK	2015	W	11	ST-11
37799	M15 240012	UK	2015	W	11	ST-11
37801	M15 240015	UK	2015	W	11	ST-11
37805	M15 240021	UK	2015	W	11	ST-11
37806	M15 240022	UK	2015	W	11	ST-11
37809	M15 240027	UK	2015	W	11	ST-11
37811	M15 240029	UK	2015	W	11	ST-11
37815	M15 240035	UK	2015	C	11	ST-11
37816	M15 240036	UK	2015	C	11	ST-11
37821	M15 240041	UK	2015	W	11	ST-11
37822	M15 240042	UK	2015	W	11	ST-11
37828	M15 240048	UK	2015	W	11	ST-11
37834	M15 240055	UK	2015	W	11	ST-11
37845	M15 240066	UK	2015	W	11	ST-11
37854	M15 240078	UK	2015	W	11	ST-11
37856	M15 240080	UK	2015	W	11	ST-11
37857	M15 240081	UK	2015	W	11	ST-11
37860	M15 240085	UK	2015	W	11	ST-11
37861	M15 240089	UK	2015	W	11	ST-11
37862	M15 240091	UK	2015	W	11	ST-11
37866	M15 240097	UK	2015	W	11	ST-11
37868	M15 240099	UK	2015	W	11	ST-11
37870	M15 240101	UK	2015	W	11	ST-11
37873	M15 240105	UK	2015	W	11	ST-11
37875	M15 240107	UK	2015	W	11	ST-11
37879	M15 240112	UK	2015	W	11	ST-11
37881	M15 240114	UK	2015	W	11	ST-11
37882	M15 240115	UK	2015	W	11	ST-11
37883	M15 240116	UK	2015	W	11	ST-11
37890	M15 240127	UK	2015	W	11	ST-11
37891	M15 240128	UK	2015	W	11	ST-11
37893	M15 240130	UK	2015	W	11	ST-11
37894	M15 240131	UK	2015	C	11	ST-11
37902	M15 240141	UK	2015	W	10651	ST-11
37904	M15 240144	UK	2015	W	11	ST-11
37907	M15 240148	UK	2015	W	11	ST-11
37910	M15 240151	UK	2015	W	11	ST-11
37915	M15 240158	UK	2015	W	11	ST-11
37918	M15 240161	UK	2015	C	11	ST-11
37922	M15 240172	UK	2015	W	10651	ST-11
37930	M15 240181	UK	2015	W	11	ST-11
37933	M15 240185	UK	2015	W	11	ST-11
37934	M15 240187	UK	2015	W	11	ST-11
37936	M15 240189	UK	2015	W	11	ST-11
37937	M15 240190	UK	2015	Y	11	ST-11
37940	M15 240193	UK	2015	W	11	ST-11
37942	M15 240195	UK	2015	W	11	ST-11
37949	M15 240205	UK	2015	C	11	ST-11
37951	M15 240207	UK	2015	W	11	ST-11
37958	M15 240216	UK	2015	W	11	ST-11
37961	M15 240221	UK	2015	W	11	ST-11
37967	M15 240227	UK	2015	C	11	ST-11
37977	M15 240242	UK	2015	W	11	ST-11
37978	M15 240244	UK	2015	W	11	ST-11
37981	M15 240248	UK	2015	W	11	ST-11
37983	M15 240251	UK	2015	W	11	ST-11
37986	M15 240256	UK	2015	W	11	ST-11
37987	M15 240257	UK	2015	W	11	ST-11
37988	M15 240258	UK	2015	W	11	ST-11
37990	M15 240260	UK	2015	W	11	ST-11
37992	M15 240263	UK	2015	W	11	ST-11
37995	M15 240271	UK	2015	W	11	ST-11
37998	M15 240277	UK	2015	W	11	ST-11
37999	M15 240278	UK	2015	W	11	ST-11
38001	M15 240280	UK	2015	W	10651	ST-11
38003	M15 240282	UK	2015	W	11	ST-11
38004	M15 240284	UK	2015	W	11	ST-11
38007	M15 240287	UK	2015	W	11	ST-11
38008	M15 240288	UK	2015	W	11	ST-11
38011	M15 240291	UK	2015	W	11	ST-11
38017	M15 240300	UK	2015	W	11	ST-11
38018	M15 240301	UK	2015	W	11	ST-11
38024	M15 240310	UK	2015	W	11	ST-11
38027	M15 240316	UK	2015	W	11	ST-11
38034	M15 240326	UK	2015	W	11	ST-11
38037	M15 240329	UK	2015	W	11	ST-11
38038	M15 240332	UK	2015	W	11	ST-11
38049	M15 240334	UK	2015	W	11	ST-11
38059	M15 240375	UK	2015	W	10651	ST-11
38060	M15 240376	UK	2015	W	11	ST-11
38063	M15 240380	UK	2015	W	11	ST-11
38064	M15 240381	UK	2015	W	11	ST-11
38065	M15 240382	UK	2015	W	11	ST-11
38066	M15 240383	UK	2015	W	11	ST-11
38067	M15 240384	UK	2015	W	11	ST-11
38076	M15 240438	UK	2015	W	11	ST-11
38079	M15 240441	UK	2015	W	11	ST-11
38085	M15 240461	UK	2015	W	11	ST-11
38088	M15 240465	UK	2015	W	11	ST-11
38096	M15 240477	UK	2015	W	11491	ST-11
38101	M15 240511	UK	2015	W	11	ST-11
38106	M15 240554	UK	2015	W	11	ST-11
38108	M15 240556	UK	2015	W	11	ST-11
38109	M15 240557	UK	2015	W	11	ST-11
38115	M15 240576	UK	2015	W	11	ST-11
38151	M15 240605	UK	2015	W	5121	ST-11
38306	15.8706	UK	2015	W	11	ST-11
38307	15.8706	UK	2015	W	11	ST-11
38308	15.8706	UK	2015	W	11	ST-11
38309	15.8706	UK	2015	W	11	ST-11
38520	M15 240722	UK	2015	W	11	ST-11
38996	15.8701	UK	2015	W	11	ST-11
38997	15.8701	UK	2015	W	11	ST-11
38998	15.8703	UK	2015	W	11	ST-11
38999	15.8703	UK	2015	W	11	ST-11
39000	15.8704	UK	2015	W	11	ST-11
39001	15.8705	UK	2015	W	11	ST-11
39319	M15 240626	UK	2015	C	11	ST-11
39320	M15 240629	UK	2015	W	11	ST-11
39326	M15 240638	UK	2015	W	11	ST-11
39328	M15 240640	UK	2015	W	11	ST-11
39331	M15 240643	UK	2015	W	11	ST-11
39335	M15 240648	UK	2015	W	11	ST-11
39337	M15 240651	UK	2015	W	11	ST-11
39340	M15 240657	UK	2015	W	11	ST-11
39341	M15 240658	UK	2015	W	11	ST-11
39342	M15 240659	UK	2015	W	11	ST-11
39344	M15 240661	UK	2015	W	11	ST-11
39345	M15 240662	UK	2015	W	11	ST-11
39346	M15 240664	UK	2015	W	11	ST-11
39352	M15 240704	UK	2015	W	11	ST-11
39353	M15 240705	UK	2015	C	11	ST-11
39356	M15 240718	UK	2015	W	11	ST-11
39358	M15 240720	UK	2015	W	11	ST-11
39361	M15 240725	UK	2015	C	11	ST-11
39365	M15 240730	UK	2015	W	11	ST-11
39368	M15 240740	UK	2015	W	11	ST-11
39369	M15 240742	UK	2015	W	11	ST-11
39373	M15 240746	UK	2015	W	11	ST-11
39378	M15 240751	UK	2015	C	11	ST-11
39385	M15 240762	UK	2015	W	11	ST-11
39388	M15 240766	UK	2015	C	11	ST-11
39395	M15 240778	UK	2015	W	11	ST-11
39396	M15 240779	UK	2015	W	11	ST-11
39398	M15 240782	UK	2015	W	11	ST-11
39401	M15 240785	UK	2015	W	11	ST-11
39403	M15 240787	UK	2015	C	11	ST-11
39404	M15 240788	UK	2015	W	11	ST-11
39408	M15 240794	UK	2015	W	11	ST-11
39409	M15 240795	UK	2015	C	11	ST-11
39410	M15 240796	UK	2015	W	11	ST-11
39411	M15 240797	UK	2015	W	11	ST-11
39412	M15 240798	UK	2015	W	11	ST-11
39421	M15 240816	UK	2015	W	11	ST-11
39422	M15 240818	UK	2015	W	11	ST-11
39423	M15 240819	UK	2015	W	11	ST-11
39427	M15 240826	UK	2015	W	11	ST-11
39429	M15 240829	UK	2015	W	11	ST-11
39430	M15 240830	UK	2015	W	11	ST-11
39431	M15 240831	UK	2015	W	11	ST-11
39433	M15 240833	UK	2015	W	11	ST-11
39435	M15 240844	UK	2015	W	11	ST-11
39436	M15 240845	UK	2015	W	11	ST-11
39438	M15 240848	UK	2015	W	11	ST-11
40322	M15 240852	UK	2015	W	11	ST-11
41451	M15 240753	UK	2015	W	11	ST-11
41455	M15 240856	UK	2015	W	11	ST-11
41458	M15 240860	UK	2015	W	11	ST-11
41459	M15 240861	UK	2015	B	10651	ST-11
41462	M15 240864	UK	2015	W	11	ST-11
41463	M15 240866	UK	2015	W	11	ST-11
41467	M15 240871	UK	2015	W	11	ST-11
41468	M15 240872	UK	2015	C	11	ST-11
41469	M15 240873	UK	2015	W	11	ST-11
41470	M15 240876	UK	2015	W	11	ST-11
41473	M15 240879	UK	2015	W	11	ST-11
41478	M15 240885	UK	2015	W	11	ST-11
41481	M15 240888	UK	2015	W	11	ST-11
41483	M15 240893	UK	2015	NG	11	ST-11
41486	M15 240896	UK	2015	W	11	ST-11
41493	M15 240904	UK	2015	C	11	ST-11
41494	M15 240905	UK	2015	W	11	ST-11
41501	M15 240918	UK	2015	W	11	ST-11
41502	M15 240919	UK	2015	W	11	ST-11
41515	M15 240936	UK	2015	W	11	ST-11
41516	M15 240937	UK	2015	W	11	ST-11
41519	M15 240940	UK	2015	W	11	ST-11
41522	M15 240946	UK	2015	W	11	ST-11
41525	M15 240952	UK	2015	W	11	ST-11
41530	M15 240958	UK	2015	W	11	ST-11
41531	M15 240960	UK	2015	W	11	ST-11
41533	M15 240963	UK	2015	W	10651	ST-11
41543	M15 240978	UK	2015	W	11	ST-11
41546	M15 240981	UK	2015	W	11	ST-11
41547	M15 240983	UK	2015	W	11	ST-11
41549	M15 240985	UK	2015	W	11	ST-11
41552	M15 240988	UK	2015	W	10651	ST-11
41558	M15 240995	UK	2015	W	11	ST-11
42475	M16 240003	UK	2016	W	11	ST-11
42476	M16 240005	UK	2016	W	10651	ST-11
42478	M16 240008	UK	2016	W	11	ST-11
42480	M16 240010	UK	2016	W	11	ST-11
42481	M16 240011	UK	2016	W	11	ST-11
42482	M16 240013	UK	2016	W	11	ST-11
42483	M16 240014	UK	2016	W	11	ST-11
42484	M16 240015	UK	2016	W	11	ST-11
42485	M16 240016	UK	2016	W	11	ST-11
42486	M16 240017	UK	2016	W	11	ST-11
42489	M16 240020	UK	2016	W	11	ST-11
42492	M16 240024	UK	2016	W	11	ST-11
42494	M16 240027	UK	2016	W	11	ST-11
42497	M16 240031	UK	2016	W	10651	ST-11
42517	M16 240052	UK	2016	W	11	ST-11
42519	M16 240055	UK	2016	W	11	ST-11
42524	M16 240063	UK	2016	C	11	ST-11
42525	M16 240065	UK	2016	W	10651	ST-11
42526	M16 240066	UK	2016	W	11	ST-11
42530	M16 240070	UK	2016	W	11	ST-11
42532	M16 240072	UK	2016	W	11	ST-11
42533	M16 240073	UK	2016	W	11	ST-11
42535	M16 240075	UK	2016	W	11	ST-11
42540	M16 240083	UK	2016	C	11	ST-11
42541	M16 240084	UK	2016	C	11	ST-11
42545	M16 240088	UK	2016	W	11	ST-11
42549	M16 240092	UK	2016	W	11	ST-11
42551	M16 240108	UK	2016	W	11	ST-11
42552	M16 240111	UK	2016	W	11	ST-11
42553	M16 240112	UK	2016	W	11	ST-11
42555	M16 240116	UK	2016	W	11	ST-11
42556	M16 240117	UK	2016	W	11	ST-11
42559	M16 240120	UK	2016	C	11	ST-11
42561	M16 240123	UK	2016	W	10651	ST-11
42564	M16 240126	UK	2016	W	11	ST-11
42568	M16 240131	UK	2016	W	11	ST-11
42572	M16 240136	UK	2016	W	11	ST-11
42573	M16 240138	UK	2016	W	10651	ST-11
42576	M16 240141	UK	2016	W	11	ST-11
42577	M16 240142	UK	2016	C	11	ST-11
42581	M16 240147	UK	2016	C	11	ST-11
42585	M16 240152	UK	2016	W	11	ST-11
42586	M16 240154	UK	2016	W	10651	ST-11
42595	M16 240163	UK	2016	W	11	ST-11
42597	M16 240167	UK	2016	C	11	ST-11
42605	M16 240180	UK	2016	W	11	ST-11
42606	M16 240181	UK	2016	W	11	ST-11
42612	M16 240189	UK	2016	W	11	ST-11
42615	M16 240193	UK	2016	C	11	ST-11
44636	M16 240226	UK	2016	W	11	ST-11
44638	M16 240232	UK	2016	W	11	ST-11
44640	M16 240234	UK	2016	W	11	ST-11
44684	M16 240195	UK	2016	W	11	ST-11
44685	M16 240196	UK	2016	W	11	ST-11
44686	M16 240197	UK	2016	W	11	ST-11
44687	M16 240198	UK	2016	W	11	ST-11
44693	16-8702245	UK	2016	C	11	ST-11
44694	16-8703795	UK	2016	C	11	ST-11
44695	16-8703796	UK	2016	C	11	ST-11
44704	M16 240214	UK	2016	W	11	ST-11
44708	M16 240219	UK	2016	W	11	ST-11
44714	M16 240231	UK	2016	W	8621	ST-11
44718	M16 240238	UK	2016	W	11	ST-11
44719	M16 240239	UK	2016	W	11	ST-11
44721	M16 240242	UK	2016	W	11	ST-11
44724	M16 240246	UK	2016	W	11	ST-11
44725	M16 240247	UK	2016	W	11	ST-11
44727	M16 240249	UK	2016	W	10651	ST-11
44728	M16 240250	UK	2016	C	11	ST-11
44730	M16 240252	UK	2016	W	11	ST-11
44733	M16 240255	UK	2016	W	11	ST-11
44736	M16 240260	UK	2016	W	11	ST-11
44739	M16 240267	UK	2016	W	11	ST-11
44740	M16 240268	UK	2016	W	11	ST-11
44741	M16 240269	UK	2016	C	11	ST-11
44742	M16 240271	UK	2016	W	12208	ST-11
44753	M16 240290	UK	2016	W	11	ST-11
44759	M16 240361	UK	2016	W	11	ST-11
44763	M16 240365	UK	2016	W	11	ST-11
44765	M16 240368	UK	2016	W	11	ST-11
44767	M16 240370	UK	2016	W	11	ST-11
44768	M16 240381	UK	2016	W	11	ST-11
44769	M16 240382	UK	2016	W	11	ST-11
44770	M16 240383	UK	2016	C	11	ST-11
44773	M16 240386	UK	2016	W	11	ST-11
44777	M16 240391	UK	2016	W	11	ST-11
44779	M16 240395	UK	2016	C	11	ST-11
44806	M16 240431	UK	2016	C	12227	ST-11
44820	M16 240451	UK	2016	W	11	ST-11
44824	M16 240494	UK	2016	B	11	ST-11
44828	M16 240499	UK	2016	W	11	ST-11
47016	M16 240253	UK	2016	W	11	ST-11
47019	M16 240296	UK	2016	W	11	ST-11
47262	M16 240513	UK	2016	W	11	ST-11
47263	M16 240514	UK	2016	W	11	ST-11
47265	M16 240516	UK	2016	W	11	ST-11
47266	M16 240518	UK	2016	C	11	ST-11
47271	M16 240523	UK	2016	W	11	ST-11
47273	M16 240525	UK	2016	W	11	ST-11
47274	M16 240528	UK	2016	W	10651	ST-11
47275	M16 240529	UK	2016	W	10651	ST-11
47277	M16 240531	UK	2016	W	10651	ST-11
47280	M16 240535	UK	2016	W	10215	ST-11
47287	M16 240542	UK	2016	W	12511	ST-11
47289	M16 240544	UK	2016	W	11	ST-11
47294	M16 240552	UK	2016	W	11	ST-11
47296	M16 240562	UK	2016	W	11	ST-11
47298	M16 240564	UK	2016	C	11	ST-11
47299	M16 240565	UK	2016	W	11	ST-11
47301	M16 240567	UK	2016	W	11	ST-11
47303	M16 240570	UK	2016	W	11	ST-11
47304	M16 240573	UK	2016	W	11	ST-11
47305	M16 240626	UK	2016	W	11	ST-11
47308	M16 240633	UK	2016	C	11	ST-11
47311	M16 240637	UK	2016	W	11	ST-11
47322	M16 240651	UK	2016	W	11	ST-11
47325	M16 240656	UK	2016	W	11	ST-11
47326	M16 240657	UK	2016	W	11	ST-11
47329	M16 240667	UK	2016	W	11	ST-11
47334	M16 240672	UK	2016	W	11	ST-11
47336	M16 240683	UK	2016	W	11	ST-11
47337	M16 240684	UK	2016	W	11	ST-11
47338	M16 240685	UK	2016	W	11	ST-11
47339	M16 240699	UK	2016	C	11	ST-11
47340	M16 240700	UK	2016	W	11	ST-11
47344	M16 240714	UK	2016	W	11	ST-11
51599	14.8701	UK	2014	W	11	ST-11
51608	14.8703	UK	2014	W	11	ST-11
51613	14.8704	UK	2014	C	11	ST-11
52835	14.8706	UK	2014	C	11	ST-11
52837	14.8707	UK	2014	W	11	ST-11
52838	14.8708	UK	2014	W	11	ST-11
52841	15.8705	UK	2015	C	11	ST-11
52845	15.8708	UK	2015	W	11	ST-11
52846	15.8709	UK	2015	W	11	ST-11
52847	15.8709	UK	2015	W	11	ST-11
52848	15.8709	UK	2015	W	11	ST-11
52849	15.871	UK	2015	B	11	ST-11
52850	16.87	UK	2016	W	11	ST-11
52851	16.87	UK	2016	W	11	ST-11
52856	16.8702	UK	2016	W	11	ST-11
52857	16.8702	UK	2016	W	11	ST-11
52858	16.8702	UK	2016	W	11	ST-11
52859	16.8703	UK	2016	W	11	ST-11
52860	16.8704	UK	2016	W	11	ST-11
52861	16.9704	UK	2016	W	11	ST-11
52862	16.8704	UK	2016	W	11	ST-11
52865	16.8705	UK	2016	C	11	ST-11
52867	16.8706	UK	2016	C	11	ST-11
52868	16.8707	UK	2016	W	11	ST-11
52869	16.8707	UK	2016	Y	11	ST-11
52872	16.8708	UK	2016	W	11	ST-11
52874	16.8709	UK	2016	W	11	ST-11
52875	16.8709	UK	2016	C	11	ST-11
52880	16.8709	UK	2016	W	11	ST-11
52885	16.871	UK	2016	W	11	ST-11
52886	16.871	UK	2016	W	11	ST-11
52888	16.8711	UK	2016	C	11	ST-11
52889	16.8711	UK	2016	W	11	ST-11
53050	M16 240681	UK	2016	W	11	ST-11
53052	M16 240706	UK	2016	W	11	ST-11
53053	M16 240707	UK	2016	W	10651	ST-11
53054	M16 240708	UK	2016	W	11	ST-11
53056	M16 240710	UK	2016	W	11	ST-11
53058	M16 240712	UK	2016	W	11	ST-11
53060	M16 240715	UK	2016	W	11	ST-11
53064	M16 240721	UK	2016	W	10651	ST-11
53067	M16 240727	UK	2016	W	11	ST-11
53069	M16 240729	UK	2016	W	11	ST-11
53072	M16 240734	UK	2016	W	11	ST-11
53074	M16 240736	UK	2016	W	10651	ST-11
53076	M16 240738	UK	2016	W	11	ST-11
53078	M16 240740	UK	2016	W	11	ST-11
53080	M16 240743	UK	2016	W	11	ST-11
53081	M16 240744	UK	2016	W	11	ST-11
53082	M16 240745	UK	2016	W	11	ST-11
53084	M16 240748	UK	2016	W	11	ST-11
53086	M16 240750	UK	2016	W	11	ST-11
53088	M16 240752	UK	2016	C	11	ST-11
53089	M16 240753	UK	2016	C	11	ST-11
53090	M16 240754	UK	2016	C	11	ST-11
53091	M16 240755	UK	2016	W	11	ST-11
53092	M16 240756	UK	2016	W	11	ST-11
53093	M16 240757	UK	2016	W	11	ST-11
53095	M16 240760	UK	2016	C	11	ST-11
53096	M16 240762	UK	2016	W	11	ST-11
53100	M16 240769	UK	2016	C	11	ST-11
53105	M16 240775	UK	2016	C	11	ST-11
53110	M16 240781	UK	2016	W	11	ST-11
53113	M16 240784	UK	2016	W	11	ST-11
53119	M16 240794	UK	2016	W	11	ST-11
53121	M16 240796	UK	2016	W	11	ST-11
53123	M16 240800	UK	2016	W	11	ST-11
53131	M16 240810	UK	2016	B	11	ST-11
53133	M16 240816	UK	2016	W	11	ST-11
53135	M16 240819	UK	2016	W	11	ST-11
53139	M16 240828	UK	2016	W	11	ST-11
53141	M16 240834	UK	2016	W	11	ST-11
53142	M16 240835	UK	2016	W	11	ST-11
53143	M16 240836	UK	2016	W	11	ST-11
53146	M16 240839	UK	2016	W	11	ST-11
53149	M16 240842	UK	2016	W	11	ST-11
53150	M16 240843	UK	2016	W	1287	ST-11
53154	M16 240849	UK	2016	W	11	ST-11
53156	M16 240851	UK	2016	W	11	ST-11
53159	M16 240855	UK	2016	W	13099	ST-11
53160	M16 240856	UK	2016	C	12227	ST-11
53164	M16 240860	UK	2016	W	11	ST-11
53165	M16 240862	UK	2016	W	11	ST-11
53166	M16 240865	UK	2016	W	11	ST-11
53167	M16 240866	UK	2016	W	11	ST-11
53168	M16 240867	UK	2016	W	11	ST-11
53170	M16 240869	UK	2016	W	11	ST-11
53172	M16 240873	UK	2016	W	11	ST-11
53176	M16 240877	UK	2016	W	11	ST-11
53178	M16 240879	UK	2016	W	11	ST-11
53179	M16 240881	UK	2016	W	11	ST-11
53183	M16 240885	UK	2016	W	11	ST-11
53188	M16 240891	UK	2016	W	11	ST-11
53190	M16 240893	UK	2016	W	11	ST-11
53192	M16 240895	UK	2016	W	11	ST-11
53193	M16 240896	UK	2016	C	11	ST-11
53194	M16 240897	UK	2016	W	11	ST-11
53195	M16 240900	UK	2016	W	11	ST-11
53196	M16 240901	UK	2016	W	11	ST-11
53198	M16 240904	UK	2016	W	11	ST-11
53199	M16 240905	UK	2016	W	11	ST-11
53200	M16 240906	UK	2016	W	11	ST-11
53208	M17 240006	UK	2017	W	11	ST-11
53212	M17 240010	UK	2017	W	11	ST-11
53213	M17 240011	UK	2017	W	11	ST-11
53214	M17 240012	UK	2017	C	11	ST-11
53215	M17 240013	UK	2017	W	11	ST-11
53217	M17 240015	UK	2017	W	11	ST-11
53221	M17 240019	UK	2017	W	11	ST-11
53222	M17 240020	UK	2017	W	11	ST-11
53223	M17 240021	UK	2017	W	11	ST-11
53224	M17 240022	UK	2017	W	11	ST-11
53226	M17 240025	UK	2017	W	11	ST-11
53230	M17 240029	UK	2017	W	11	ST-11
53231	M17 240030	UK	2017	W	11	ST-11
53232	M17 240031	UK	2017	W	11	ST-11
53233	M17 240032	UK	2017	W	11	ST-11
53236	M17 240035	UK	2017	W	11	ST-11
53237	M17 240036	UK	2017	W	11	ST-11
53244	M17 240044	UK	2017	W	11	ST-11
53249	M17 240049	UK	2017	W	11	ST-11
53252	M17 240052	UK	2017	W	11	ST-11
53255	M17 240057	UK	2017	W	11	ST-11
53256	M17 240058	UK	2017	W	11	ST-11
53259	M17 240063	UK	2017	W	11	ST-11
53262	M17 240066	UK	2017	C	11	ST-11
53264	M17 240068	UK	2017	W	11	ST-11
53267	M17 240071	UK	2017	W	11	ST-11
53269	M17 240073	UK	2017	W	11	ST-11
53270	M17 240076	UK	2017	W	11	ST-11
53274	M17 240084	UK	2017	W	11	ST-11
53275	M17 240085	UK	2017	W	11	ST-11
53276	M17 240086	UK	2017	C	11	ST-11
53278	M17 240089	UK	2017	C	11	ST-11
53279	M17 240092	UK	2017	W	11	ST-11
53280	M17 240095	UK	2017	C	11	ST-11
53284	M17 240100	UK	2017	W	11	ST-11
53287	M17 240103	UK	2017	W	11	ST-11
53290	M17 240119	UK	2017	B	12227	ST-11
53291	M17 240120	UK	2017	W	11	ST-11
53292	M17 240122	UK	2017	W	11	ST-11
53296	M17 240127	UK	2017	W	11	ST-11
53297	M17 240129	UK	2017	W	11	ST-11
53300	M17 240133	UK	2017	W	11	ST-11
53301	M17 240134	UK	2017	NG	11	ST-11
53302	M17 240135	UK	2017	W	11	ST-11
53303	M17 240136	UK	2017	C	11	ST-11
53304	M17 240137	UK	2017	C	11	ST-11
53305	M17 240138	UK	2017	W	11	ST-11
53306	M17 240139	UK	2017	C	11	ST-11
53307	M17 240140	UK	2017	W	11	ST-11
53308	M17 240141	UK	2017	W	11	ST-11
53309	M17 240142	UK	2017	W	11	ST-11
53315	M17 240149	UK	2017	W	11	ST-11
53316	M17 240150	UK	2017	W	11	ST-11
53317	M17 240153	UK	2017	C	11	ST-11
53322	M17 240161	UK	2017	W	11	ST-11
53323	M17 240162	UK	2017	W	11	ST-11
53325	M17 240164	UK	2017	W	11	ST-11
53328	M17 240167	UK	2017	W	11	ST-11
53338	M17 240179	UK	2017	W	11	ST-11
53339	M17 240180	UK	2017	W	11	ST-11
53340	M17 240181	UK	2017	W	11	ST-11
53341	M17 240182	UK	2017	W	11	ST-11
53343	M17 240184	UK	2017	W	11	ST-11
53344	M17 240185	UK	2017	W	11	ST-11
53346	M17 240192	UK	2017	W	13097	ST-11
53347	M17 240193	UK	2017	W	11	ST-11
53350	M17 240196	UK	2017	W	11	ST-11
53352	M17 240198	UK	2017	W	11	ST-11
53354	M17 240200	UK	2017	W	11	ST-11
53355	M17 240201	UK	2017	W	11	ST-11
53358	M17 240204	UK	2017	W	11	ST-11
53360	M17 240207	UK	2017	W	11	ST-11
53362	M17 240211	UK	2017	C	11	ST-11
53365	M17 240214	UK	2017	W	11	ST-11
53367	M17 240217	UK	2017	W	11	ST-11
53368	M17 240218	UK	2017	W	11	ST-11
53369	M17 240221	UK	2017	W	11	ST-11
53371	M17 240226	UK	2017	W	11	ST-11
53372	M17 240227	UK	2017	W	11	ST-11
19999	M10 240581	UK	2010	NG	1136	ST-1136
42537	M16 240078	UK	2016	NG	1136	ST-1136
20035	M10 240636	UK	2010	B	1157	ST-1157
20152	M10 240811	UK	2010	B	9888	ST-1157
20390	M11 240338	UK	2011	B	3737	ST-1157
21243	M11 241026	UK	2011	B	10268	ST-1157
21252	M11 241037	UK	2011	B	1157	ST-1157
21267	M11 241059	UK	2011	B	10271	ST-1157
21383	M12 240135	UK	2012	B	1157	ST-1157
28027	M13 240264	UK	2013	B	1157	ST-1157
28107	M12 240641	UK	2012	NG	10301	ST-1157
28113	M13 240410	UK	2013	NG	1157	ST-1157
35242	09.1857.M	UK	2009	B	1157	ST-1157
35322	11.5445.E	UK	2011	B	1157	ST-1157
35389	13.6117.K	UK	2013	B	1157	ST-1157
35396	13.8092.Q	UK	2013	B	3135	ST-1157
35641	M14 240208	UK	2014	NG	11282	ST-1157
35776	M14 240437	UK	2014	B	1157	ST-1157
37777	M14 240641	UK	2014	B	1157	ST-1157
37792	M15 240004	UK	2015	B	1157	ST-1157
39354	M15 240716	UK	2015	NG	1157	ST-1157
39405	M15 240789	UK	2015	B	1157	ST-1157
42619	14-8704599	UK	2014	B	1157	ST-1157
44680	15-8708102	UK	2015	B	1157	ST-1157
44683	15-8708164	UK	2015	B	1727	ST-1157
44723	M16 240244	UK	2016	B	1157	ST-1157
53364	M17 240213	UK	2017	B	1157	ST-1157
35777	M14 240441	UK	2014	C	11332	ST-116
19990	M10 240559	UK	2010	B	162	ST-162
20151	M10 240810	UK	2010	B	162	ST-162
20267	M11 240131	UK	2011	B	162	ST-162
20388	M11 240335	UK	2011	B	162	ST-162
20413	M11 240371	UK	2011	B	162	ST-162
20418	M11 240381	UK	2011	B	162	ST-162
21109	M11 240467	UK	2011	B	162	ST-162
21119	M11 240479	UK	2011	B	162	ST-162
21177	M11 240743	UK	2011	B	162	ST-162
21266	M11 241058	UK	2011	B	162	ST-162
21309	M12 240031	UK	2012	B	162	ST-162
21315	M12 240038	UK	2012	B	162	ST-162
21325	M12 240051	UK	2012	B	162	ST-162
21416	M12 240197	UK	2012	B	162	ST-162
21420	M12 240203	UK	2012	B	162	ST-162
27830	M12 240736	UK	2012	B	162	ST-162
27832	M12 240739	UK	2012	B	162	ST-162
27891	M12 240878	UK	2012	B	162	ST-162
27948	M13 240091	UK	2013	B	162	ST-162
27968	M13 240143	UK	2013	B	9293	ST-162
28029	M13 240272	UK	2013	B	162	ST-162
28047	M13 240414	UK	2013	B	162	ST-162
28071	M13 240468	UK	2013	B	162	ST-162
35228	09.1208.P	UK	2009	B	162	ST-162
35230	09.1292.T	UK	2009	B	162	ST-162
35246	09.1999.X	UK	2009	B	162	ST-162
35264	09.3063.L	UK	2009	B	162	ST-162
35315	11.3133.X	UK	2011	B	162	ST-162
35360	12.2589.T	UK	2012	B	9293	ST-162
35452	M13 240593	UK	2013	B	162	ST-162
35663	M14 240242	UK	2014	B	162	ST-162
35668	M14 240251	UK	2014	B	162	ST-162
35676	M14 240259	UK	2014	B	11295	ST-162
35798	M14 240481	UK	2014	B	162	ST-162
37683	M14 240514	UK	2014	B	10817	ST-162
37807	M15 240024	UK	2015	B	162	ST-162
37831	M15 240051	UK	2015	B	162	ST-162
37877	M15 240110	UK	2015	B	11478	ST-162
37929	M15 240180	UK	2015	B	162	ST-162
38072	M15 240423	UK	2015	B	162	ST-162
38117	M15 240602	UK	2015	B	162	ST-162
39380	M15 240755	UK	2015	NG	11877	ST-162
42589	M16 240157	UK	2016	B	162	ST-162
42633	15-8700319	UK	2015	B	162	ST-162
44681	15-8707130	UK	2015	B	162	ST-162
44691	16-8702974	UK	2016	B	162	ST-162
44772	M16 240385	UK	2016	B	162	ST-162
47255	16-8705040	UK	2016	B	162	ST-162
47269	M16 240521	UK	2016	B	162	ST-162
47272	M16 240524	UK	2016	B	162	ST-162
51601	14.8702	UK	2014	B	162	ST-162
51603	14.8702	UK	2014	B	162	ST-162
52863	16.8705	UK	2016	B	162	ST-162
52871	16.8708	UK	2016	B	162	ST-162
53182	M16 240884	UK	2016	B	162	ST-162
53187	M16 240889	UK	2016	B	162	ST-162
53204	M17 240002	UK	2017	B	162	ST-162
53349	M17 240195	UK	2017	B	162	ST-162
53376	16-8707908	UK	2016	B	162	ST-162
20059	M10 240675	UK	2010	Y	168	ST-167
20199	M11 240038	UK	2011	Y	168	ST-167
20230	M11 240071	UK	2011	Y	767	ST-167
20396	M11 240346	UK	2011	Y	168	ST-167
21409	M12 240181	UK	2012	Y	1624	ST-167
21504	M12 240330	UK	2012	Y	884	ST-167
28019	M13 240250	UK	2013	B	840	ST-167
28183	M12 240796	UK	2012	Y	10727	ST-167
28184	M12 240797	UK	2012	Y	10728	ST-167
28189	M12 240821	UK	2012	Y	10729	ST-167
28202	M13 240053	UK	2013	Y	10730	ST-167
28204	M13 240059	UK	2013	Y	10728	ST-167
28211	M13 240126	UK	2013	Y	3980	ST-167
28213	M13 240136	UK	2013	Y	168	ST-167
35449	M13 240588	UK	2013	W/Y	1624	ST-167
35472	M13 240627	UK	2013	Y	1624	ST-167
35501	M13 240696	UK	2013	Y	1627	ST-167
35523	M13 240733	UK	2013	Y	11254	ST-167
35547	M14 240015	UK	2014	Y	1624	ST-167
35685	M14 240277	UK	2014	Y	767	ST-167
37671	M14 240439	UK	2014	NG	767	ST-167
37676	M14 240506	UK	2014	Y	1624	ST-167
37786	M14 240651	UK	2014	Y	1624	ST-167
37808	M15 240025	UK	2015	Y	11474	ST-167
37810	M15 240028	UK	2015	Y	168	ST-167
37813	M15 240031	UK	2015	Y	1624	ST-167
37851	M15 240073	UK	2015	Y	1624	ST-167
38114	M15 240575	UK	2015	W/Y	167	ST-167
42596	M16 240165	UK	2016	Y	10730	ST-167
47264	M16 240515	UK	2016	Y	10730	ST-167
53055	M16 240709	UK	2016	Y	10728	ST-167
53261	M17 240065	UK	2017	Y	1624	ST-167
53326	M17 240165	UK	2017	Y	168	ST-167
53327	M17 240166	UK	2017	Y	1627	ST-167
20053	M10 240666	UK	2010	W/Y	1466	ST-174
20072	M10 240694	UK	2010	Y	1466	ST-174
20115	M10 240759	UK	2010	Y	1466	ST-174
20232	M11 240073	UK	2011	Y	1466	ST-174
20282	M11 240161	UK	2011	Y	1466	ST-174
20285	M11 240165	UK	2011	Y	1466	ST-174
20308	M11 240209	UK	2011	Y	1466	ST-174
20310	M11 240211	UK	2011	Y	9893	ST-174
20458	M11 240441	UK	2011	W	2977	ST-174
21339	M12 240076	UK	2012	Y	1466	ST-174
21421	M12 240205	UK	2012	Y	1466	ST-174
28086	M12 240854	UK	2012	C	1466	ST-174
28087	M12 240855	UK	2012	C	1466	ST-174
28173	M12 240717	UK	2012	Y	1466	ST-174
28180	M12 240784	UK	2012	Y	1466	ST-174
34513	M13 240507	UK	2013	B	9126	ST-174
35266	09.3167.H	UK	2009	Y	7867	ST-174
35268	09.3302.K	UK	2009	Y	1466	ST-174
37729	M14 240571	UK	2014	Y	1466	ST-174
37863	M15 240094	UK	2015	Y	1466	ST-174
38129	M15 240033	UK	2015	Y	1466	ST-174
39377	M15 240750	UK	2015	Y	1466	ST-174
41551	M15 240987	UK	2015	Y	1466	ST-174
52864	16.8705	UK	2016	Y	1466	ST-174
41526	M15 240953	UK	2015	NG	175	ST-175
19993	M10 240569	UK	2010	B	18	ST-18
20065	M10 240683	UK	2010	B	18	ST-18
20206	M11 240045	UK	2011	B	858	ST-18
20240	M11 240084	UK	2011	B	4997	ST-18
20269	M11 240133	UK	2011	B	18	ST-18
21186	M11 240771	UK	2011	B	18	ST-18
21240	M11 241023	UK	2011	B	5529	ST-18
21331	M12 240062	UK	2012	B	10276	ST-18
21413	M12 240188	UK	2012	B	10289	ST-18
27855	M12 240806	UK	2012	B	9774	ST-18
27882	M12 240865	UK	2012	B	10704	ST-18
35395	13.7896.B	UK	2013	B	18	ST-18
35583	M14 240093	UK	2014	B	11272	ST-18
37773	M14 240637	UK	2014	B	18	ST-18
42627	14-8706349	UK	2014	B	18	ST-18
53173	M16 240874	UK	2016	B	18	ST-18
47293	M16 240550	UK	2016	X	181	ST-181
28109	M13 240134	UK	2013	NG	823	ST-198
38048	M15 240237	UK	2015	NG	823	ST-198
38111	M15 240572	UK	2015	NG	823	ST-198
47290	M16 240547	UK	2016	NG	12513	ST-198
19958	M10 240476	UK	2010	B	9812	ST-213
19982	M10 240546	UK	2010	B	213	ST-213
19991	M10 240566	UK	2010	B	213	ST-213
19992	M10 240568	UK	2010	B	213	ST-213
20009	M10 240595	UK	2010	B	213	ST-213
20015	M10 240606	UK	2010	B	213	ST-213
20022	M10 240617	UK	2010	B	213	ST-213
20024	M10 240619	UK	2010	B	213	ST-213
20025	M10 240621	UK	2010	B	213	ST-213
20046	M10 240651	UK	2010	B	9881	ST-213
20052	M10 240665	UK	2010	B	213	ST-213
20075	M10 240701	UK	2010	B	213	ST-213
20077	M10 240703	UK	2010	B	9884	ST-213
20084	M10 240712	UK	2010	B	213	ST-213
20087	M10 240717	UK	2010	B	9830	ST-213
20102	M10 240742	UK	2010	B	8955	ST-213
20110	M10 240751	UK	2010	B	213	ST-213
20130	M10 240778	UK	2010	B	9187	ST-213
20144	M10 240799	UK	2010	B	213	ST-213
20207	M11 240046	UK	2011	B	213	ST-213
20210	M11 240050	UK	2011	B	213	ST-213
20220	M11 240061	UK	2011	B	9833	ST-213
20233	M11 240074	UK	2011	B	213	ST-213
20252	M11 240111	UK	2011	B	213	ST-213
20254	M11 240113	UK	2011	B	2666	ST-213
20259	M11 240121	UK	2011	B	213	ST-213
20270	M11 240134	UK	2011	B	213	ST-213
20271	M11 240137	UK	2011	B	213	ST-213
20275	M11 240147	UK	2011	B	213	ST-213
20295	M11 240181	UK	2011	B	213	ST-213
20341	M11 240266	UK	2011	B	213	ST-213
20342	M11 240268	UK	2011	B	213	ST-213
20350	M11 240282	UK	2011	B	213	ST-213
20357	M11 240290	UK	2011	B	9895	ST-213
20362	M11 240297	UK	2011	B	213	ST-213
20389	M11 240337	UK	2011	B	213	ST-213
20395	M11 240344	UK	2011	B	213	ST-213
20398	M11 240348	UK	2011	B	213	ST-213
21099	M11 240452	UK	2011	B	213	ST-213
21101	M11 240456	UK	2011	B	2391	ST-213
21111	M11 240470	UK	2011	B	213	ST-213
21126	M11 240489	UK	2011	B	213	ST-213
21141	M11 240510	UK	2011	B	213	ST-213
21145	M11 240595	UK	2011	B	213	ST-213
21147	M11 240598	UK	2011	B	213	ST-213
21164	M11 240727	UK	2011	B	213	ST-213
21173	M11 240738	UK	2011	B	213	ST-213
21212	M11 240948	UK	2011	B	213	ST-213
21217	M11 240976	UK	2011	B	213	ST-213
21218	M11 240977	UK	2011	B	213	ST-213
21221	M11 240980	UK	2011	B	10267	ST-213
21268	M11 241060	UK	2011	B	575	ST-213
21275	M11 241068	UK	2011	B	213	ST-213
21281	M11 241076	UK	2011	B	10272	ST-213
21284	M12 240000	UK	2012	B	213	ST-213
21303	M12 240022	UK	2012	B	213	ST-213
21306	M12 240028	UK	2012	B	213	ST-213
21323	M12 240047	UK	2012	B	10274	ST-213
21332	M12 240063	UK	2012	B	3635	ST-213
21345	M12 240083	UK	2012	B	10279	ST-213
21351	M12 240092	UK	2012	B	3496	ST-213
21363	M12 240107	UK	2012	B	10281	ST-213
21365	M12 240114	UK	2012	B	7309	ST-213
21385	M12 240142	UK	2012	B	213	ST-213
21387	M12 240145	UK	2012	B	213	ST-213
21392	M12 240151	UK	2012	B	213	ST-213
21424	M12 240208	UK	2012	B	9884	ST-213
21428	M12 240215	UK	2012	B	3496	ST-213
21435	M12 240225	UK	2012	B	2660	ST-213
21436	M12 240226	UK	2012	B	213	ST-213
21438	M12 240228	UK	2012	B	213	ST-213
21456	M12 240253	UK	2012	B	213	ST-213
21457	M12 240254	UK	2012	B	213	ST-213
21467	M12 240273	UK	2012	B	213	ST-213
21501	M12 240326	UK	2012	B	213	ST-213
21503	M12 240329	UK	2012	B	575	ST-213
27780	M12 240340	UK	2012	B	213	ST-213
27813	M12 240703	UK	2012	B	213	ST-213
27815	M12 240705	UK	2012	B	10697	ST-213
27823	M12 240724	UK	2012	B	7676	ST-213
27828	M12 240733	UK	2012	B	10699	ST-213
27845	M12 240782	UK	2012	B	213	ST-213
27874	M12 240848	UK	2012	B	213	ST-213
27883	M12 240866	UK	2012	B	213	ST-213
27898	M12 240899	UK	2012	B	213	ST-213
27916	M13 240029	UK	2013	B	213	ST-213
27942	M13 240081	UK	2013	B	9194	ST-213
27963	M13 240127	UK	2013	B	213	ST-213
27965	M13 240132	UK	2013	B	213	ST-213
27980	M13 240170	UK	2013	B	575	ST-213
27988	M13 240187	UK	2013	B	213	ST-213
28010	M13 240232	UK	2013	B	213	ST-213
28018	M13 240249	UK	2013	B	10716	ST-213
28023	M13 240258	UK	2013	B	10338	ST-213
28034	M13 240281	UK	2013	B	10719	ST-213
28054	M13 240427	UK	2013	B	213	ST-213
28058	M13 240437	UK	2013	B	213	ST-213
28063	M13 240451	UK	2013	B	3120	ST-213
28077	M13 240481	UK	2013	B	10723	ST-213
28111	M13 240240	UK	2013	NG	213	ST-213
34516	M13 240519	UK	2013	B	213	ST-213
35234	09.1402.B	UK	2009	B	11221	ST-213
35238	09.1557.B	UK	2009	B	213	ST-213
35254	09.2439.W	UK	2009	B	213	ST-213
35260	09.2939.N	UK	2009	B	213	ST-213
35274	10.1352.R	UK	2010	B	213	ST-213
35292	10.2854.Q	UK	2010	B	11223	ST-213
35306	11.1688.D	UK	2011	B	2660	ST-213
35307	11.1709.B	UK	2011	B	213	ST-213
35310	11.2087.F	UK	2011	B	213	ST-213
35340	13.1370.Z	UK	2013	B	213	ST-213
35347	13.3207.X	UK	2013	B	10201	ST-213
35369	12.6501.H	UK	2012	B	9753	ST-213
35379	09.2807.A	UK	2009	B	213	ST-213
35386	13.5556.G	UK	2013	B	11224	ST-213
35387	13.5557.N	UK	2013	B	11224	ST-213
35431	M13 240542	UK	2013	B	11226	ST-213
35442	M13 240566	UK	2013	B	213	ST-213
35466	M13 240619	UK	2013	B	213	ST-213
35488	M13 240665	UK	2013	B	213	ST-213
35512	M13 240715	UK	2013	B	575	ST-213
35514	M13 240717	UK	2013	B	213	ST-213
35516	M13 240719	UK	2013	B	213	ST-213
35521	M13 240729	UK	2013	B	213	ST-213
35522	M13 240731	UK	2013	B	213	ST-213
35527	M13 240739	UK	2013	B	2101	ST-213
35540	M13 240755	UK	2013	B	11262	ST-213
35558	M14 240030	UK	2014	B	575	ST-213
35576	M14 240078	UK	2014	B	213	ST-213
35579	M14 240087	UK	2014	B	3116	ST-213
35603	M14 240121	UK	2014	B	213	ST-213
35639	M14 240205	UK	2014	B	4145	ST-213
35645	M14 240215	UK	2014	B	213	ST-213
35703	M14 240305	UK	2014	B	213	ST-213
35712	M14 240316	UK	2014	B	213	ST-213
35715	M14 240321	UK	2014	B	11300	ST-213
35718	M14 240328	UK	2014	B	213	ST-213
35733	M14 240354	UK	2014	B	213	ST-213
35743	M14 240372	UK	2014	B	213	ST-213
35747	M14 240379	UK	2014	B	213	ST-213
35757	M14 240393	UK	2014	B	213	ST-213
37662	M14 240138	UK	2014	B	213	ST-213
37680	M14 240510	UK	2014	B	11465	ST-213
37726	M14 240566	UK	2014	B	3635	ST-213
37733	M14 240575	UK	2014	B	9881	ST-213
37788	M14 240653	UK	2014	B	213	ST-213
37818	M15 240038	UK	2015	B	213	ST-213
37824	M15 240044	UK	2015	B	9176	ST-213
37846	M15 240067	UK	2015	B	213	ST-213
37878	M15 240111	UK	2015	B	11479	ST-213
37886	M15 240120	UK	2015	B	2100	ST-213
37901	M15 240140	UK	2015	B	213	ST-213
37905	M15 240145	UK	2015	B	213	ST-213
37909	M15 240150	UK	2015	B	3282	ST-213
37935	M15 240188	UK	2015	B	213	ST-213
37950	M15 240206	UK	2015	B	213	ST-213
37956	M15 240213	UK	2015	B	213	ST-213
37957	M15 240215	UK	2015	B	213	ST-213
37969	M15 240231	UK	2015	B	11871	ST-213
37997	M15 240276	UK	2015	B	213	ST-213
38019	M15 240302	UK	2015	B	11485	ST-213
38047	M15 240092	UK	2015	B	11488	ST-213
38050	M15 240335	UK	2015	B	11489	ST-213
38083	M15 240459	UK	2015	B	213	ST-213
38084	M15 240460	UK	2015	B	213	ST-213
38122	M13 240546	UK	2013	B	213	ST-213
38123	M13 240639	UK	2013	B	213	ST-213
38124	M13 240642	UK	2013	B	3120	ST-213
39392	M15 240772	UK	2015	B	8955	ST-213
39417	M15 240805	UK	2015	B	213	ST-213
40321	M15 240851	UK	2015	B	3872	ST-213
40324	M15 240854	UK	2015	B	11880	ST-213
41453	M15 240853	UK	2015	B	9194	ST-213
41488	M15 240899	UK	2015	B	4224	ST-213
41500	M15 240917	UK	2015	B	213	ST-213
41527	M15 240954	UK	2015	B	213	ST-213
42521	M16 240058	UK	2016	B	213	ST-213
42542	M16 240085	UK	2016	B	9194	ST-213
42546	M16 240089	UK	2016	B	213	ST-213
42567	M16 240130	UK	2016	B	12011	ST-213
42583	M16 240149	UK	2016	B	213	ST-213
42602	M16 240176	UK	2016	B	213	ST-213
42604	M16 240179	UK	2016	B	12178	ST-213
42625	14-8706036	UK	2014	B	213	ST-213
42641	15-8701697	UK	2015	B	9193	ST-213
42647	15-8704692	UK	2015	B	6607	ST-213
42648	15-8704767	UK	2015	B	6607	ST-213
42652	15-8708361	UK	2015	B	213	ST-213
44682	15-8708162	UK	2015	B	11601	ST-213
44690	16-8702265	UK	2016	B	213	ST-213
44692	16-8703068	UK	2016	B	2660	ST-213
44696	M16 240199	UK	2016	B	213	ST-213
44717	M16 240237	UK	2016	B	213	ST-213
44749	M16 240282	UK	2016	B	12011	ST-213
44756	M16 240297	UK	2016	B	2660	ST-213
44764	M16 240367	UK	2016	B	8021	ST-213
47312	M16 240638	UK	2016	B	3641	ST-213
52878	16.8709	UK	2016	B	213	ST-213
52891	16.8711	UK	2016	B	9663	ST-213
53051	M16 240705	UK	2016	B	3127	ST-213
53068	M16 240728	UK	2016	B	12985	ST-213
53101	M16 240770	UK	2016	B	213	ST-213
53206	M17 240004	UK	2017	B	1721	ST-213
53216	M17 240014	UK	2017	B	13098	ST-213
53225	M17 240023	UK	2017	B	213	ST-213
53240	M17 240039	UK	2017	B	213	ST-213
53295	M17 240126	UK	2017	B	4562	ST-213
53311	M17 240144	UK	2017	B	213	ST-213
53319	M17 240156	UK	2017	B	213	ST-213
53329	M17 240168	UK	2017	B	213	ST-213
53332	M17 240171	UK	2017	B	575	ST-213
53345	M17 240190	UK	2017	B	213	ST-213
53351	M17 240197	UK	2017	B	213	ST-213
53366	M17 240216	UK	2017	B	12993	ST-213
53374	16-8703069	UK	2016	B	2660	ST-213
53380	16-8709026	UK	2016	B	213	ST-213
53385	16-8711411	UK	2016	B	9663	ST-213
20021	M10 240616	UK	2010	W	1224	ST-22
20039	M10 240641	UK	2010	W	184	ST-22
20042	M10 240644	UK	2010	Y	3651	ST-22
20101	M10 240737	UK	2010	W	1281	ST-22
20114	M10 240756	UK	2010	W	2114	ST-22
20132	M10 240781	UK	2010	Y	3651	ST-22
20159	M10 240822	UK	2010	W	1224	ST-22
20191	M11 240029	UK	2011	W	1286	ST-22
20318	M11 240231	UK	2011	W	184	ST-22
20337	M11 240261	UK	2011	W	184	ST-22
20365	M11 240302	UK	2011	W	184	ST-22
20399	M11 240349	UK	2011	W	22	ST-22
20422	M11 240387	UK	2011	W	184	ST-22
21132	M11 240497	UK	2011	W	1281	ST-22
21139	M11 240508	UK	2011	W	184	ST-22
21156	M11 240716	UK	2011	W	3795	ST-22
21175	M11 240741	UK	2011	W	1286	ST-22
21193	M11 240780	UK	2011	W/Y	3651	ST-22
21271	M11 241064	UK	2011	Y	3651	ST-22
21290	M12 240008	UK	2012	W	184	ST-22
21349	M12 240088	UK	2012	W	1224	ST-22
21371	M12 240121	UK	2012	W	184	ST-22
21380	M12 240132	UK	2012	W	184	ST-22
21454	M12 240251	UK	2012	W	1281	ST-22
27793	M12 240659	UK	2012	B	1617	ST-22
28118	M12 240671	UK	2012	W	184	ST-22
28120	M12 240734	UK	2012	W	1286	ST-22
28123	M12 240762	UK	2012	W	184	ST-22
28124	M12 240772	UK	2012	W	22	ST-22
28126	M12 240789	UK	2012	W	184	ST-22
28127	M12 240823	UK	2012	W	1286	ST-22
28129	M12 240862	UK	2012	W	1281	ST-22
28133	M13 240013	UK	2013	W	1286	ST-22
28140	M13 240089	UK	2013	W	184	ST-22
28145	M13 240176	UK	2013	W	22	ST-22
28155	M13 240431	UK	2013	W	10726	ST-22
28160	M13 240465	UK	2013	W	184	ST-22
28187	M12 240802	UK	2012	Y	114	ST-22
28199	M13 240020	UK	2013	Y	114	ST-22
28203	M13 240055	UK	2013	Y	114	ST-22
30149	M13 240704	UK	2013	W	1617	ST-22
34512	M13 240503	UK	2013	W	184	ST-22
35258	09.2799.W	UK	2009	W	1224	ST-22
35283	10.2273.P	UK	2010	W	184	ST-22
35295	10.3134.R	UK	2010	Y	114	ST-22
35323	11.5563.G	UK	2011	W	184	ST-22
35333	12.1555.H	UK	2012	W	4475	ST-22
35380	12.3882.E	UK	2012	Y	114	ST-22
35393	13.7214.J	UK	2013	W	1224	ST-22
35423	M13 240528	UK	2013	W	184	ST-22
35453	M13 240595	UK	2013	W	184	ST-22
35517	M13 240720	UK	2013	Y	114	ST-22
35560	M14 240038	UK	2014	W	2638	ST-22
35607	M14 240125	UK	2014	W	114	ST-22
35610	M14 240129	UK	2014	W	1617	ST-22
35661	M14 240238	UK	2014	W	22	ST-22
35697	M14 240293	UK	2014	Y	114	ST-22
35791	M14 240473	UK	2014	W	22	ST-22
37740	M14 240590	UK	2014	W	184	ST-22
37840	M15 240061	UK	2015	W	3849	ST-22
37864	M15 240095	UK	2015	W	184	ST-22
38061	M15 240378	UK	2015	W	1617	ST-22
38091	M15 240469	UK	2015	W	1286	ST-22
39327	M15 240639	UK	2015	W	184	ST-22
39381	M15 240757	UK	2015	B	1617	ST-22
39387	M15 240765	UK	2015	W	1286	ST-22
39416	M15 240803	UK	2015	W	1281	ST-22
41539	M15 240974	UK	2015	W	1281	ST-22
44726	M16 240248	UK	2016	W	22	ST-22
44758	M16 240301	UK	2016	B	12224	ST-22
44761	M16 240363	UK	2016	Y	114	ST-22
47313	M16 240639	UK	2016	W	1617	ST-22
47343	M16 240704	UK	2016	W	184	ST-22
51607	14.8703	UK	2014	W	184	ST-22
20320	M11 240233	UK	2011	NG	9835	ST-226
19962	M10 240503	UK	2010	Y	23	ST-23
19963	M10 240505	UK	2010	Y	1655	ST-23
19964	M10 240507	UK	2010	Y	183	ST-23
19970	M10 240520	UK	2010	Y	1655	ST-23
19976	M10 240530	UK	2010	Y	9813	ST-23
19977	M10 240531	UK	2010	Y	1655	ST-23
19979	M10 240534	UK	2010	Y	1655	ST-23
19980	M10 240536	UK	2010	Y	1655	ST-23
19981	M10 240540	UK	2010	Y	9814	ST-23
19998	M10 240580	UK	2010	Y	1655	ST-23
20006	M10 240590	UK	2010	Y	23	ST-23
20032	M10 240632	UK	2010	Y	1655	ST-23
20033	M10 240633	UK	2010	Y	1655	ST-23
20041	M10 240643	UK	2010	Y	23	ST-23
20067	M10 240685	UK	2010	Y	1655	ST-23
20074	M10 240700	UK	2010	Y	6463	ST-23
20099	M10 240732	UK	2010	Y	23	ST-23
20104	M10 240745	UK	2010	Y	1655	ST-23
20128	M10 240776	UK	2010	Y	1655	ST-23
20129	M10 240777	UK	2010	Y	23	ST-23
20135	M10 240786	UK	2010	Y	9831	ST-23
20136	M10 240787	UK	2010	Y	1655	ST-23
20143	M10 240798	UK	2010	Y	1655	ST-23
20146	M10 240804	UK	2010	Y	1655	ST-23
20164	M11 240000	UK	2011	Y	23	ST-23
20169	M11 240005	UK	2011	Y	23	ST-23
20171	M11 240007	UK	2011	Y	1655	ST-23
20193	M11 240031	UK	2011	Y	1655	ST-23
20197	M11 240036	UK	2011	Y	1655	ST-23
20204	M11 240043	UK	2011	Y	9842	ST-23
20224	M11 240065	UK	2011	Y	1655	ST-23
20245	M11 240096	UK	2011	Y	1655	ST-23
20256	M11 240116	UK	2011	Y	1655	ST-23
20264	M11 240126	UK	2011	Y	23	ST-23
20281	M11 240157	UK	2011	Y	10138	ST-23
20286	M11 240166	UK	2011	Y	23	ST-23
20302	M11 240192	UK	2011	Y	1655	ST-23
20309	M11 240210	UK	2011	Y	23	ST-23
20314	M11 240215	UK	2011	Y	1655	ST-23
20315	M11 240216	UK	2011	Y	1655	ST-23
20317	M11 240227	UK	2011	Y	6463	ST-23
20335	M11 240258	UK	2011	Y	23	ST-23
20339	M11 240263	UK	2011	Y	1655	ST-23
20346	M11 240277	UK	2011	Y	1655	ST-23
20347	M11 240278	UK	2011	Y	1655	ST-23
20351	M11 240283	UK	2011	Y	23	ST-23
20363	M11 240298	UK	2011	Y	1655	ST-23
20372	M11 240312	UK	2011	Y	23	ST-23
20373	M11 240313	UK	2011	Y	1655	ST-23
20379	M11 240319	UK	2011	Y	1655	ST-23
20380	M11 240322	UK	2011	Y	1655	ST-23
20383	M11 240326	UK	2011	Y	1655	ST-23
20404	M11 240358	UK	2011	W/Y	23	ST-23
20414	M11 240372	UK	2011	NG	1655	ST-23
20430	M11 240396	UK	2011	Y	1655	ST-23
20433	M11 240399	UK	2011	Y	1655	ST-23
20440	M11 240411	UK	2011	Y	4183	ST-23
20451	M11 240430	UK	2011	Y	23	ST-23
20454	M11 240435	UK	2011	Y	1655	ST-23
20459	M11 240442	UK	2011	Y	23	ST-23
21094	M11 240446	UK	2011	Y	1655	ST-23
21105	M11 240461	UK	2011	Y	23	ST-23
21107	M11 240465	UK	2011	Y	1655	ST-23
21108	M11 240466	UK	2011	Y	8096	ST-23
21130	M11 240494	UK	2011	Y	1655	ST-23
21138	M11 240507	UK	2011	Y	1655	ST-23
21148	M11 240599	UK	2011	Y	1655	ST-23
21151	M11 240657	UK	2011	Y	23	ST-23
21153	M11 240710	UK	2011	Y	1655	ST-23
21157	M11 240717	UK	2011	Y	1655	ST-23
21158	M11 240719	UK	2011	Y	3582	ST-23
21167	M11 240731	UK	2011	Y	1655	ST-23
21169	M11 240734	UK	2011	Y	23	ST-23
21172	M11 240737	UK	2011	Y	1655	ST-23
21178	M11 240745	UK	2011	Y	8411	ST-23
21183	M11 240765	UK	2011	Y	1655	ST-23
21187	M11 240772	UK	2011	Y	1655	ST-23
21192	M11 240779	UK	2011	Y	6463	ST-23
21198	M11 240788	UK	2011	Y	1655	ST-23
21201	M11 240793	UK	2011	Y	23	ST-23
21205	M11 240801	UK	2011	Y	23	ST-23
21223	M11 240982	UK	2011	Y	1655	ST-23
21227	M11 240987	UK	2011	Y	23	ST-23
21229	M11 240991	UK	2011	Y	1655	ST-23
21250	M11 241035	UK	2011	Y	1655	ST-23
21255	M11 241042	UK	2011	Y	1655	ST-23
21259	M11 241047	UK	2011	Y	1655	ST-23
21262	M11 241051	UK	2011	Y	23	ST-23
21272	M11 241065	UK	2011	Y	1655	ST-23
21274	M11 241067	UK	2011	Y	1655	ST-23
21276	M11 241069	UK	2011	Y	23	ST-23
21283	M11 241078	UK	2011	Y	1655	ST-23
21293	M12 240011	UK	2012	Y	23	ST-23
21294	M12 240012	UK	2012	Y	1655	ST-23
21295	M12 240013	UK	2012	Y	1655	ST-23
21304	M12 240024	UK	2012	Y	1655	ST-23
21338	M12 240072	UK	2012	Y	1655	ST-23
21343	M12 240080	UK	2012	Y	1655	ST-23
21346	M12 240084	UK	2012	Y	1655	ST-23
21356	M12 240098	UK	2012	Y	1655	ST-23
21366	M12 240115	UK	2012	Y	1655	ST-23
21372	M12 240122	UK	2012	Y	1655	ST-23
21373	M12 240123	UK	2012	Y	1655	ST-23
21399	M12 240166	UK	2012	Y	23	ST-23
21403	M12 240171	UK	2012	Y	1655	ST-23
21404	M12 240174	UK	2012	Y	23	ST-23
21408	M12 240180	UK	2012	Y	1655	ST-23
21410	M12 240184	UK	2012	Y	23	ST-23
21440	M12 240230	UK	2012	Y	23	ST-23
21443	M12 240237	UK	2012	Y	1655	ST-23
21447	M12 240241	UK	2012	Y	23	ST-23
21448	M12 240242	UK	2012	Y	1655	ST-23
21451	M12 240248	UK	2012	Y	6463	ST-23
21466	M12 240272	UK	2012	Y	1655	ST-23
21472	M12 240288	UK	2012	Y	23	ST-23
21473	M12 240289	UK	2012	Y	10294	ST-23
21475	M12 240291	UK	2012	Y	23	ST-23
21476	M12 240293	UK	2012	Y	1655	ST-23
21480	M12 240300	UK	2012	Y	1655	ST-23
21493	M12 240318	UK	2012	Y	1655	ST-23
21497	M12 240322	UK	2012	Y	23	ST-23
21502	M12 240328	UK	2012	Y	23	ST-23
28130	M12 240881	UK	2012	W/Y	1655	ST-23
28165	M12 240342	UK	2012	Y	23	ST-23
28166	M12 240343	UK	2012	Y	1655	ST-23
28167	M12 240643	UK	2012	Y	1655	ST-23
28168	M12 240646	UK	2012	Y	1655	ST-23
28169	M12 240661	UK	2012	Y	23	ST-23
28170	M12 240701	UK	2012	Y	23	ST-23
28171	M12 240713	UK	2012	Y	1655	ST-23
28172	M12 240715	UK	2012	Y	23	ST-23
28174	M12 240728	UK	2012	Y	23	ST-23
28175	M12 240746	UK	2012	Y	3030	ST-23
28177	M12 240760	UK	2012	Y	1655	ST-23
28178	M12 240767	UK	2012	Y	1655	ST-23
28179	M12 240779	UK	2012	Y	1655	ST-23
28181	M12 240788	UK	2012	Y	10294	ST-23
28182	M12 240791	UK	2012	Y	1655	ST-23
28185	M12 240799	UK	2012	Y	23	ST-23
28186	M12 240801	UK	2012	Y	1655	ST-23
28188	M12 240816	UK	2012	Y	23	ST-23
28190	M12 240822	UK	2012	Y	23	ST-23
28191	M12 240840	UK	2012	Y	23	ST-23
28192	M12 240857	UK	2012	Y	1655	ST-23
28193	M12 240885	UK	2012	Y	1655	ST-23
28194	M12 240886	UK	2012	Y	23	ST-23
28195	M12 240888	UK	2012	Y	23	ST-23
28196	M12 240894	UK	2012	Y	1655	ST-23
28197	M12 240897	UK	2012	Y	23	ST-23
28198	M13 240011	UK	2013	Y	1655	ST-23
28200	M13 240035	UK	2013	Y	1655	ST-23
28201	M13 240044	UK	2013	Y	1655	ST-23
28205	M13 240064	UK	2013	Y	1655	ST-23
28206	M13 240073	UK	2013	Y	23	ST-23
28207	M13 240087	UK	2013	Y	1655	ST-23
28208	M13 240099	UK	2013	Y	1655	ST-23
28209	M13 240102	UK	2013	Y	1655	ST-23
28210	M13 240116	UK	2013	Y	1655	ST-23
28212	M13 240131	UK	2013	Y	23	ST-23
28214	M13 240144	UK	2013	Y	1655	ST-23
28215	M13 240146	UK	2013	Y	1655	ST-23
28216	M13 240154	UK	2013	Y	1655	ST-23
28217	M13 240165	UK	2013	Y	1655	ST-23
28218	M13 240184	UK	2013	Y	1655	ST-23
28219	M13 240188	UK	2013	Y	1655	ST-23
28220	M13 240194	UK	2013	Y	1655	ST-23
28221	M13 240200	UK	2013	Y	1655	ST-23
28222	M13 240203	UK	2013	Y	23	ST-23
28223	M13 240218	UK	2013	Y	1655	ST-23
28224	M13 240220	UK	2013	Y	1655	ST-23
28226	M13 240242	UK	2013	Y	23	ST-23
28227	M13 240244	UK	2013	Y	1655	ST-23
28228	M13 240265	UK	2013	Y	1655	ST-23
28229	M13 240267	UK	2013	Y	1655	ST-23
28230	M13 240268	UK	2013	Y	10732	ST-23
28231	M13 240381	UK	2013	Y	23	ST-23
28233	M13 240396	UK	2013	Y	4446	ST-23
28234	M13 240407	UK	2013	Y	1655	ST-23
28235	M13 240439	UK	2013	Y	1655	ST-23
30211	M13 240735	UK	2013	C	23	ST-23
34502	M13 240484	UK	2013	Y	1655	ST-23
34503	M13 240485	UK	2013	Y	1655	ST-23
35249	09.2061.P	UK	2009	Y	1655	ST-23
35271	10.1171.X	UK	2010	Y	23	ST-23
35314	11.2909.Z	UK	2011	Y	1655	ST-23
35317	11.3888.K	UK	2011	Y	1655	ST-23
35332	12.1512.D	UK	2012	Y	1655	ST-23
35336	12.8840.D	UK	2012	Y	1655	ST-23
35338	13.1296.J	UK	2013	Y	1655	ST-23
35348	13.3348.S	UK	2013	Y	23	ST-23
35349	13.3789.S	UK	2013	Y	1655	ST-23
35359	12.2412.W	UK	2012	Y	23	ST-23
35370	12.7012.F	UK	2012	Y	1655	ST-23
35376	12.8408.J	UK	2012	Y	1655	ST-23
35382	13.4767.Q	UK	2013	Y	1655	ST-23
35384	13.5154.G	UK	2013	Y	1655	ST-23
35391	13.6352.Q	UK	2013	Y	1655	ST-23
35424	M13 240529	UK	2013	Y	1655	ST-23
35432	M13 240543	UK	2013	Y	1655	ST-23
35435	M13 240549	UK	2013	Y	1655	ST-23
35445	M13 240573	UK	2013	Y	9842	ST-23
35446	M13 240574	UK	2013	Y	1655	ST-23
35456	M13 240599	UK	2013	Y	23	ST-23
35460	M13 240610	UK	2013	Y	1655	ST-23
35468	M13 240622	UK	2013	Y	1655	ST-23
35484	M13 240652	UK	2013	Y	1655	ST-23
35487	M13 240663	UK	2013	Y	1655	ST-23
35491	M13 240673	UK	2013	Y	23	ST-23
35508	M13 240706	UK	2013	Y	23	ST-23
35513	M13 240716	UK	2013	Y	23	ST-23
35518	M13 240721	UK	2013	Y	1655	ST-23
35520	M13 240725	UK	2013	Y	1655	ST-23
35535	M13 240749	UK	2013	Y	1655	ST-23
35536	M13 240750	UK	2013	Y	1655	ST-23
35537	M13 240751	UK	2013	Y	1655	ST-23
35538	M13 240752	UK	2013	Y	23	ST-23
35543	M14 240010	UK	2014	Y	23	ST-23
35545	M14 240012	UK	2014	Y	1655	ST-23
35565	M14 240049	UK	2014	Y	1655	ST-23
35567	M14 240056	UK	2014	Y	1655	ST-23
35569	M14 240060	UK	2014	Y	1655	ST-23
35574	M14 240075	UK	2014	Y	1655	ST-23
35582	M14 240091	UK	2014	Y	1655	ST-23
35590	M14 240104	UK	2014	Y	23	ST-23
35591	M14 240105	UK	2014	Y	23	ST-23
35592	M14 240108	UK	2014	Y	1655	ST-23
35595	M14 240111	UK	2014	Y	1655	ST-23
35596	M14 240112	UK	2014	Y	1655	ST-23
35599	M14 240117	UK	2014	Y	1655	ST-23
35600	M14 240118	UK	2014	Y	23	ST-23
35615	M14 240136	UK	2014	Y	1655	ST-23
35616	M14 240140	UK	2014	Y	23	ST-23
35620	M14 240144	UK	2014	Y	1655	ST-23
35627	M14 240157	UK	2014	Y	1655	ST-23
35637	M14 240202	UK	2014	Y	11280	ST-23
35642	M14 240210	UK	2014	Y	23	ST-23
35653	M14 240225	UK	2014	Y	1655	ST-23
35660	M14 240237	UK	2014	Y	1655	ST-23
35665	M14 240246	UK	2014	Y	11293	ST-23
35684	M14 240276	UK	2014	Y	1655	ST-23
35692	M14 240285	UK	2014	Y	1655	ST-23
35694	M14 240287	UK	2014	Y	1655	ST-23
35696	M14 240291	UK	2014	Y	1655	ST-23
35709	M14 240313	UK	2014	W/Y	1655	ST-23
35721	M14 240335	UK	2014	Y	11331	ST-23
35746	M14 240378	UK	2014	Y	1655	ST-23
35761	M14 240404	UK	2014	Y	23	ST-23
35767	M14 240423	UK	2014	Y	1655	ST-23
35802	M14 240487	UK	2014	Y	1655	ST-23
35804	M14 240489	UK	2014	Y	1655	ST-23
35830	M13 240674	UK	2013	Y	1655	ST-23
37664	M14 240156	UK	2014	Y	1655	ST-23
37666	M14 240170	UK	2014	Y	23	ST-23
37667	M14 240172	UK	2014	Y	1655	ST-23
37672	M14 240501	UK	2014	Y	1655	ST-23
37689	M14 240521	UK	2014	Y	11866	ST-23
37691	M14 240523	UK	2014	Y	23	ST-23
37694	M14 240526	UK	2014	Y	1655	ST-23
37697	M14 240530	UK	2014	Y	3582	ST-23
37703	M14 240536	UK	2014	Y	1655	ST-23
37714	M14 240553	UK	2014	Y	1655	ST-23
37751	M14 240607	UK	2014	Y	23	ST-23
37765	M14 240629	UK	2014	Y	11868	ST-23
37768	M14 240632	UK	2014	Y	11472	ST-23
37771	M14 240635	UK	2014	Y	1655	ST-23
37794	M15 240006	UK	2015	Y	1655	ST-23
37795	M15 240007	UK	2015	Y	23	ST-23
37796	M15 240009	UK	2015	Y	23	ST-23
37812	M15 240030	UK	2015	Y	1655	ST-23
37820	M15 240040	UK	2015	Y	1655	ST-23
37827	M15 240047	UK	2015	Y	23	ST-23
37833	M15 240054	UK	2015	Y	1655	ST-23
37836	M15 240057	UK	2015	Y	1655	ST-23
37838	M15 240059	UK	2015	Y	1655	ST-23
37841	M15 240062	UK	2015	Y	23	ST-23
37843	M15 240064	UK	2015	Y	1655	ST-23
37847	M15 240068	UK	2015	Y	23	ST-23
37850	M15 240072	UK	2015	Y	23	ST-23
37853	M15 240077	UK	2015	Y	23	ST-23
37858	M15 240082	UK	2015	Y	1655	ST-23
37859	M15 240083	UK	2015	Y	1655	ST-23
37867	M15 240098	UK	2015	Y	23	ST-23
37869	M15 240100	UK	2015	Y	1655	ST-23
37885	M15 240119	UK	2015	Y	1655	ST-23
37889	M15 240126	UK	2015	Y	1655	ST-23
37892	M15 240129	UK	2015	NG	23	ST-23
37895	M15 240132	UK	2015	Y	1655	ST-23
37897	M15 240134	UK	2015	Y	1655	ST-23
37899	M15 240136	UK	2015	Y	1655	ST-23
37911	M15 240152	UK	2015	Y	1655	ST-23
37914	M15 240157	UK	2015	W	1655	ST-23
37917	M15 240160	UK	2015	Y	1655	ST-23
37923	M15 240174	UK	2015	Y	1655	ST-23
37926	M15 240177	UK	2015	Y	10458	ST-23
37938	M15 240191	UK	2015	Y	23	ST-23
37939	M15 240192	UK	2015	Y	1655	ST-23
37941	M15 240194	UK	2015	Y	1655	ST-23
37944	M15 240199	UK	2015	Y	1655	ST-23
37955	M15 240212	UK	2015	Y	1655	ST-23
37963	M15 240223	UK	2015	Y	23	ST-23
37979	M15 240246	UK	2015	Y	4183	ST-23
37980	M15 240247	UK	2015	Y	1655	ST-23
37982	M15 240250	UK	2015	Y	1655	ST-23
37993	M15 240265	UK	2015	Y	1655	ST-23
38005	M15 240285	UK	2015	Y	1655	ST-23
38010	M15 240290	UK	2015	Y	1655	ST-23
38012	M15 240292	UK	2015	Y	23	ST-23
38013	M15 240294	UK	2015	Y	1655	ST-23
38014	M15 240295	UK	2015	Y	1655	ST-23
38021	M15 240305	UK	2015	Y	1655	ST-23
38028	M15 240319	UK	2015	Y	1655	ST-23
38053	M15 240352	UK	2015	Y	11875	ST-23
38078	M15 240440	UK	2015	Y	1655	ST-23
38087	M15 240464	UK	2015	Y	11490	ST-23
38099	M15 240498	UK	2015	Y	1655	ST-23
38104	M15 240525	UK	2015	Y	1655	ST-23
38116	M15 240600	UK	2015	Y	1655	ST-23
39321	M15 240631	UK	2015	W/Y	1655	ST-23
39330	M15 240642	UK	2015	Y	23	ST-23
39332	M15 240644	UK	2015	Y	1655	ST-23
39339	M15 240653	UK	2015	Y	9253	ST-23
39347	M15 240697	UK	2015	Y	11754	ST-23
39359	M15 240723	UK	2015	Y	23	ST-23
39363	M15 240728	UK	2015	Y	1655	ST-23
39376	M15 240749	UK	2015	Y	1655	ST-23
39379	M15 240752	UK	2015	Y	1655	ST-23
39419	M15 240807	UK	2015	Y	1655	ST-23
39420	M15 240808	UK	2015	Y	1655	ST-23
39426	M15 240822	UK	2015	Y	11754	ST-23
39432	M15 240832	UK	2015	Y	1655	ST-23
39437	M15 240847	UK	2015	Y	1655	ST-23
39440	M15 240850	UK	2015	Y	1655	ST-23
41466	M15 240870	UK	2015	Y	1655	ST-23
41476	M15 240882	UK	2015	Y	23	ST-23
41480	M15 240887	UK	2015	Y	1655	ST-23
41495	M15 240911	UK	2015	Y	1655	ST-23
41497	M15 240913	UK	2015	Y	23	ST-23
41498	M15 240914	UK	2015	Y	1655	ST-23
41499	M15 240915	UK	2015	Y	1655	ST-23
41508	M15 240926	UK	2015	Y	1655	ST-23
41514	M15 240935	UK	2015	Y	1655	ST-23
41517	M15 240938	UK	2015	Y	1655	ST-23
41521	M15 240945	UK	2015	Y	1655	ST-23
41529	M15 240957	UK	2015	Y	23	ST-23
41534	M15 240965	UK	2015	Y	1655	ST-23
41535	M15 240967	UK	2015	Y	23	ST-23
41553	M15 240989	UK	2015	Y	1655	ST-23
41556	M15 240992	UK	2015	Y	23	ST-23
41557	M15 240994	UK	2015	Y	1655	ST-23
42474	M16 240002	UK	2016	Y	23	ST-23
42479	M16 240009	UK	2016	Y	1655	ST-23
42487	M16 240018	UK	2016	Y	1655	ST-23
42490	M16 240021	UK	2016	Y	1655	ST-23
42493	M16 240026	UK	2016	W	1655	ST-23
42496	M16 240030	UK	2016	Y	1655	ST-23
42518	M16 240053	UK	2016	Y	12176	ST-23
42527	M16 240067	UK	2016	Y	1655	ST-23
42529	M16 240069	UK	2016	Y	1655	ST-23
42538	M16 240081	UK	2016	Y	1655	ST-23
42539	M16 240082	UK	2016	Y	3582	ST-23
42557	M16 240118	UK	2016	Y	23	ST-23
42574	M16 240139	UK	2016	Y	1655	ST-23
42582	M16 240148	UK	2016	Y	1655	ST-23
42593	M16 240161	UK	2016	Y	23	ST-23
42599	M16 240170	UK	2016	Y	23	ST-23
42600	M16 240173	UK	2016	Y	1655	ST-23
42607	M16 240182	UK	2016	Y	1655	ST-23
42608	M16 240184	UK	2016	Y	1655	ST-23
42609	M16 240185	UK	2016	Y	1655	ST-23
42613	M16 240190	UK	2016	Y	23	ST-23
44639	M16 240233	UK	2016	Y	1655	ST-23
44706	M16 240217	UK	2016	Y	11754	ST-23
44716	M16 240236	UK	2016	Y	1655	ST-23
44720	M16 240241	UK	2016	Y	1655	ST-23
44738	M16 240264	UK	2016	Y	23	ST-23
44747	M16 240278	UK	2016	Y	23	ST-23
44748	M16 240280	UK	2016	Y	1655	ST-23
44751	M16 240286	UK	2016	Y	23	ST-23
44760	M16 240362	UK	2016	Y	23	ST-23
44775	M16 240389	UK	2016	Y	1655	ST-23
44793	M16 240413	UK	2016	Y	1655	ST-23
44814	M16 240439	UK	2016	Y	23	ST-23
44817	M16 240445	UK	2016	Y	1625	ST-23
44822	M16 240492	UK	2016	Y	1655	ST-23
47259	M16 240213	UK	2016	Y	1655	ST-23
47260	M16 240240	UK	2016	Y	1655	ST-23
47270	M16 240522	UK	2016	Y	1655	ST-23
47281	M16 240536	UK	2016	Y	1655	ST-23
47282	M16 240537	UK	2016	Y	1655	ST-23
47283	M16 240538	UK	2016	Y	1655	ST-23
47284	M16 240539	UK	2016	Y	1655	ST-23
47295	M16 240554	UK	2016	Y	1655	ST-23
47297	M16 240563	UK	2016	Y	1655	ST-23
47302	M16 240569	UK	2016	Y	1655	ST-23
47315	M16 240641	UK	2016	Y	1655	ST-23
47316	M16 240642	UK	2016	Y	23	ST-23
47317	M16 240643	UK	2016	Y	1655	ST-23
47320	M16 240648	UK	2016	Y	23	ST-23
47324	M16 240655	UK	2016	Y	23	ST-23
47327	M16 240659	UK	2016	Y	1655	ST-23
47330	M16 240668	UK	2016	Y	1655	ST-23
47335	M16 240673	UK	2016	Y	1655	ST-23
51600	14.8701	UK	2014	Y	1655	ST-23
51604	14.8702	UK	2014	Y	1655	ST-23
51612	14.8704	UK	2014	Y	23	ST-23
52831	14.8704	UK	2014	Y	23	ST-23
52833	14.8705	UK	2014	Y	23	ST-23
52834	14.8706	UK	2014	Y	1655	ST-23
52836	14.8706	UK	2014	Y	1655	ST-23
52839	15.8703	UK	2015	Y	1655	ST-23
52842	15.8706	UK	2015	Y	1655	ST-23
52843	15.8706	UK	2015	Y	1655	ST-23
52844	15.8706	UK	2015	Y	23	ST-23
52852	16.87	UK	2016	Y	23	ST-23
52853	16.87	UK	2016	Y	6800	ST-23
52854	16.87	UK	2016	Y	1655	ST-23
52855	16.87	UK	2016	Y	11280	ST-23
52877	16.8709	UK	2016	Y	1655	ST-23
52881	16.871	UK	2016	Y	11280	ST-23
52882	16.871	UK	2016	Y	1655	ST-23
52884	16.871	UK	2016	Y	23	ST-23
52887	16.871	UK	2016	Y	1655	ST-23
53061	M16 240718	UK	2016	Y	23	ST-23
53062	M16 240719	UK	2016	Y	1655	ST-23
53066	M16 240723	UK	2016	Y	23	ST-23
53079	M16 240742	UK	2016	W	1655	ST-23
53085	M16 240749	UK	2016	Y	13092	ST-23
53098	M16 240767	UK	2016	Y	1655	ST-23
53103	M16 240773	UK	2016	Y	23	ST-23
53106	M16 240777	UK	2016	Y	13093	ST-23
53108	M16 240779	UK	2016	Y	1655	ST-23
53112	M16 240783	UK	2016	Y	1655	ST-23
53122	M16 240797	UK	2016	Y	1655	ST-23
53125	M16 240803	UK	2016	Y	1655	ST-23
53147	M16 240840	UK	2016	Y	1655	ST-23
53155	M16 240850	UK	2016	Y	1655	ST-23
53158	M16 240853	UK	2016	Y	1655	ST-23
53162	M16 240858	UK	2016	Y	1655	ST-23
53171	M16 240870	UK	2016	Y	1655	ST-23
53174	M16 240875	UK	2016	Y	1655	ST-23
53180	M16 240882	UK	2016	Y	1655	ST-23
53201	M16 240909	UK	2016	Y	23	ST-23
53202	M16 240910	UK	2016	Y	1655	ST-23
53203	M17 240001	UK	2017	Y	1655	ST-23
53205	M17 240003	UK	2017	Y	6463	ST-23
53211	M17 240009	UK	2017	Y	23	ST-23
53218	M17 240016	UK	2017	Y	23	ST-23
53220	M17 240018	UK	2017	Y	23	ST-23
53227	M17 240026	UK	2017	Y	23	ST-23
53239	M17 240038	UK	2017	Y	1655	ST-23
53245	M17 240045	UK	2017	Y	1655	ST-23
53257	M17 240059	UK	2017	Y	1655	ST-23
53258	M17 240062	UK	2017	Y	1655	ST-23
53277	M17 240088	UK	2017	Y	1655	ST-23
53283	M17 240098	UK	2017	Y	23	ST-23
53294	M17 240125	UK	2017	Y	1655	ST-23
53318	M17 240154	UK	2017	Y	12176	ST-23
53324	M17 240163	UK	2017	Y	1655	ST-23
53330	M17 240169	UK	2017	Y	1655	ST-23
53334	M17 240174	UK	2017	Y	1378	ST-23
53353	M17 240199	UK	2017	Y	23	ST-23
28057	M13 240434	UK	2013	B	254	ST-254
18968	M10 240474	UK	2010	B	269	ST-269
19023	M10 240473	UK	2010	B	1161	ST-269
19028	M10 240485	UK	2010	B	275	ST-269
19029	M10 240487	UK	2010	B	1049	ST-269
19031	M10 240490	UK	2010	B	1161	ST-269
19959	M10 240499	UK	2010	B	275	ST-269
19969	M10 240515	UK	2010	B	269	ST-269
19974	M10 240527	UK	2010	B	269	ST-269
19975	M10 240528	UK	2010	B	7833	ST-269
19986	M10 240550	UK	2010	B	1163	ST-269
19987	M10 240553	UK	2010	B	1161	ST-269
19995	M10 240572	UK	2010	B	1161	ST-269
20012	M10 240602	UK	2010	B	1161	ST-269
20018	M10 240612	UK	2010	B	269	ST-269
20019	M10 240613	UK	2010	B	1161	ST-269
20027	M10 240623	UK	2010	B	1161	ST-269
20028	M10 240624	UK	2010	B	275	ST-269
20029	M10 240626	UK	2010	B	4401	ST-269
20031	M10 240631	UK	2010	C	467	ST-269
20036	M10 240638	UK	2010	B	275	ST-269
20043	M10 240645	UK	2010	B	283	ST-269
20044	M10 240649	UK	2010	B	275	ST-269
20047	M10 240652	UK	2010	B	275	ST-269
20050	M10 240661	UK	2010	B	1161	ST-269
20056	M10 240670	UK	2010	B	269	ST-269
20064	M10 240682	UK	2010	B	269	ST-269
20078	M10 240704	UK	2010	B	269	ST-269
20081	M10 240708	UK	2010	B	1195	ST-269
20082	M10 240709	UK	2010	B	479	ST-269
20083	M10 240711	UK	2010	B	275	ST-269
20085	M10 240713	UK	2010	B	9829	ST-269
20090	M10 240720	UK	2010	B	479	ST-269
20095	M10 240728	UK	2010	B	9840	ST-269
20096	M10 240729	UK	2010	B	1049	ST-269
20103	M10 240743	UK	2010	B	269	ST-269
20111	M10 240752	UK	2010	B	1161	ST-269
20119	M10 240766	UK	2010	B	479	ST-269
20121	M10 240768	UK	2010	B	2873	ST-269
20122	M10 240770	UK	2010	B	1195	ST-269
20124	M10 240772	UK	2010	B	1161	ST-269
20126	M10 240774	UK	2010	B	1161	ST-269
20131	M10 240779	UK	2010	B	269	ST-269
20133	M10 240783	UK	2010	B	1161	ST-269
20138	M10 240789	UK	2010	B	283	ST-269
20149	M10 240808	UK	2010	B	1092	ST-269
20153	M10 240814	UK	2010	B	1161	ST-269
20156	M10 240819	UK	2010	B	1163	ST-269
20163	M10 240826	UK	2010	B	7789	ST-269
20168	M11 240004	UK	2011	B	1161	ST-269
20173	M11 240010	UK	2011	B	269	ST-269
20184	M11 240022	UK	2011	B	1161	ST-269
20187	M11 240025	UK	2011	B	1049	ST-269
20188	M11 240026	UK	2011	B	1049	ST-269
20192	M11 240030	UK	2011	B	269	ST-269
20205	M11 240044	UK	2011	B	9843	ST-269
20217	M11 240058	UK	2011	B	275	ST-269
20221	M11 240062	UK	2011	B	275	ST-269
20225	M11 240066	UK	2011	B	275	ST-269
20229	M11 240070	UK	2011	B	269	ST-269
20231	M11 240072	UK	2011	B	275	ST-269
20235	M11 240077	UK	2011	B	269	ST-269
20242	M11 240086	UK	2011	B	1774	ST-269
20268	M11 240132	UK	2011	B	269	ST-269
20272	M11 240139	UK	2011	B	1161	ST-269
20274	M11 240146	UK	2011	B	275	ST-269
20278	M11 240150	UK	2011	B	7939	ST-269
20279	M11 240151	UK	2011	B	479	ST-269
20294	M11 240180	UK	2011	B	1049	ST-269
20298	M11 240185	UK	2011	B	1049	ST-269
20311	M11 240212	UK	2011	B	275	ST-269
20316	M11 240226	UK	2011	B	269	ST-269
20322	M11 240236	UK	2011	B	1161	ST-269
20332	M11 240251	UK	2011	B	269	ST-269
20340	M11 240265	UK	2011	B	9836	ST-269
20344	M11 240275	UK	2011	B	269	ST-269
20349	M11 240281	UK	2011	B	275	ST-269
20352	M11 240284	UK	2011	B	1161	ST-269
20366	M11 240303	UK	2011	B	275	ST-269
20374	M11 240314	UK	2011	B	1161	ST-269
20375	M11 240315	UK	2011	B	1161	ST-269
20376	M11 240316	UK	2011	B	479	ST-269
20377	M11 240317	UK	2011	B	269	ST-269
20378	M11 240318	UK	2011	B	9004	ST-269
20385	M11 240330	UK	2011	B	1161	ST-269
20387	M11 240334	UK	2011	B	6604	ST-269
20401	M11 240352	UK	2011	B	1161	ST-269
20402	M11 240353	UK	2011	B	275	ST-269
20411	M11 240368	UK	2011	B	269	ST-269
20416	M11 240375	UK	2011	B	269	ST-269
20417	M11 240376	UK	2011	B	269	ST-269
20423	M11 240388	UK	2011	B	9823	ST-269
20429	M11 240395	UK	2011	B	1163	ST-269
20431	M11 240397	UK	2011	B	1161	ST-269
20434	M11 240401	UK	2011	B	1161	ST-269
20437	M11 240405	UK	2011	B	1161	ST-269
20439	M11 240409	UK	2011	B	269	ST-269
20442	M11 240413	UK	2011	B	9826	ST-269
20446	M11 240422	UK	2011	B	467	ST-269
20450	M11 240428	UK	2011	B	275	ST-269
20455	M11 240436	UK	2011	B	1161	ST-269
21093	M11 240445	UK	2011	B	1161	ST-269
21097	M11 240450	UK	2011	B	1161	ST-269
21100	M11 240453	UK	2011	B	275	ST-269
21103	M11 240458	UK	2011	B	1163	ST-269
21104	M11 240459	UK	2011	B	6428	ST-269
21106	M11 240463	UK	2011	B	1161	ST-269
21118	M11 240477	UK	2011	B	467	ST-269
21120	M11 240480	UK	2011	B	269	ST-269
21121	M11 240484	UK	2011	B	1163	ST-269
21140	M11 240509	UK	2011	B	1163	ST-269
21143	M11 240593	UK	2011	B	10264	ST-269
21146	M11 240597	UK	2011	B	1161	ST-269
21162	M11 240725	UK	2011	B	275	ST-269
21168	M11 240733	UK	2011	B	1161	ST-269
21170	M11 240735	UK	2011	B	6604	ST-269
21180	M11 240750	UK	2011	B	1942	ST-269
21181	M11 240762	UK	2011	B	275	ST-269
21189	M11 240774	UK	2011	B	269	ST-269
21190	M11 240775	UK	2011	B	283	ST-269
21191	M11 240776	UK	2011	B	1161	ST-269
21194	M11 240781	UK	2011	B	269	ST-269
21202	M11 240796	UK	2011	B	269	ST-269
21207	M11 240803	UK	2011	B	1163	ST-269
21209	M11 240942	UK	2011	B	275	ST-269
21211	M11 240946	UK	2011	B	1161	ST-269
21215	M11 240954	UK	2011	B	1161	ST-269
21219	M11 240978	UK	2011	B	13	ST-269
21220	M11 240979	UK	2011	B	275	ST-269
21226	M11 240986	UK	2011	B	1161	ST-269
21231	M11 240993	UK	2011	B	7226	ST-269
21233	M11 240995	UK	2011	B	1161	ST-269
21241	M11 241024	UK	2011	B	269	ST-269
21244	M11 241027	UK	2011	B	1161	ST-269
21248	M11 241033	UK	2011	B	269	ST-269
21251	M11 241036	UK	2011	B	269	ST-269
21260	M11 241048	UK	2011	B	275	ST-269
21269	M11 241061	UK	2011	B	1049	ST-269
21279	M11 241074	UK	2011	B	1163	ST-269
21282	M11 241077	UK	2011	B	1161	ST-269
21285	M12 240001	UK	2012	B	1161	ST-269
21287	M12 240003	UK	2012	B	1161	ST-269
21289	M12 240006	UK	2012	B	1161	ST-269
21297	M12 240015	UK	2012	NG	269	ST-269
21307	M12 240029	UK	2012	B	1161	ST-269
21308	M12 240030	UK	2012	B	275	ST-269
21312	M12 240034	UK	2012	B	1774	ST-269
21317	M12 240040	UK	2012	B	1049	ST-269
21322	M12 240046	UK	2012	B	1161	ST-269
21327	M12 240057	UK	2012	B	269	ST-269
21329	M12 240059	UK	2012	B	1161	ST-269
21333	M12 240066	UK	2012	B	269	ST-269
21342	M12 240079	UK	2012	B	1161	ST-269
21348	M12 240086	UK	2012	B	1049	ST-269
21350	M12 240090	UK	2012	B	1163	ST-269
21357	M12 240099	UK	2012	B	1163	ST-269
21358	M12 240100	UK	2012	B	269	ST-269
21362	M12 240105	UK	2012	B	1161	ST-269
21367	M12 240116	UK	2012	B	1195	ST-269
21393	M12 240153	UK	2012	B	269	ST-269
21405	M12 240175	UK	2012	B	1163	ST-269
21406	M12 240176	UK	2012	B	10288	ST-269
21418	M12 240201	UK	2012	B	269	ST-269
21422	M12 240206	UK	2012	B	1161	ST-269
21425	M12 240211	UK	2012	B	269	ST-269
21430	M12 240219	UK	2012	C	10291	ST-269
21433	M12 240223	UK	2012	B	1161	ST-269
21439	M12 240229	UK	2012	B	275	ST-269
21445	M12 240239	UK	2012	B	269	ST-269
21449	M12 240243	UK	2012	B	269	ST-269
21465	M12 240267	UK	2012	B	269	ST-269
21471	M12 240287	UK	2012	B	1161	ST-269
21477	M12 240294	UK	2012	B	467	ST-269
21486	M12 240307	UK	2012	B	1195	ST-269
21489	M12 240310	UK	2012	B	269	ST-269
21498	M12 240323	UK	2012	C	467	ST-269
21508	M12 240335	UK	2012	B	1163	ST-269
27781	M12 240341	UK	2012	B	9180	ST-269
27789	M12 240653	UK	2012	B	1161	ST-269
27799	M12 240674	UK	2012	B	1161	ST-269
27800	M12 240675	UK	2012	B	10695	ST-269
27801	M12 240678	UK	2012	B	269	ST-269
27804	M12 240683	UK	2012	B	2157	ST-269
27807	M12 240688	UK	2012	B	1161	ST-269
27808	M12 240691	UK	2012	B	1161	ST-269
27810	M12 240694	UK	2012	B	1855	ST-269
27817	M12 240707	UK	2012	B	269	ST-269
27820	M12 240718	UK	2012	B	1163	ST-269
27821	M12 240719	UK	2012	B	1161	ST-269
27825	M12 240729	UK	2012	B	275	ST-269
27831	M12 240737	UK	2012	B	479	ST-269
27834	M12 240745	UK	2012	B	1774	ST-269
27840	M12 240765	UK	2012	B	2738	ST-269
27842	M12 240773	UK	2012	B	1049	ST-269
27844	M12 240781	UK	2012	B	275	ST-269
27851	M12 240793	UK	2012	B	7789	ST-269
27859	M12 240810	UK	2012	B	269	ST-269
27860	M12 240812	UK	2012	B	479	ST-269
27861	M12 240814	UK	2012	B	10703	ST-269
27866	M12 240827	UK	2012	B	1161	ST-269
27867	M12 240831	UK	2012	B	1049	ST-269
27868	M12 240834	UK	2012	B	479	ST-269
27869	M12 240842	UK	2012	B	1161	ST-269
27877	M12 240851	UK	2012	B	275	ST-269
27878	M12 240852	UK	2012	B	269	ST-269
27879	M12 240853	UK	2012	B	269	ST-269
27880	M12 240858	UK	2012	B	269	ST-269
27884	M12 240867	UK	2012	B	479	ST-269
27890	M12 240877	UK	2012	B	1161	ST-269
27892	M12 240879	UK	2012	B	1161	ST-269
27893	M12 240880	UK	2012	B	269	ST-269
27896	M12 240893	UK	2012	B	8288	ST-269
27899	M12 240900	UK	2012	B	2592	ST-269
27904	M13 240003	UK	2013	B	269	ST-269
27905	M13 240004	UK	2013	B	479	ST-269
27906	M13 240005	UK	2013	B	2166	ST-269
27911	M13 240014	UK	2013	B	1161	ST-269
27917	M13 240030	UK	2013	B	10708	ST-269
27920	M13 240033	UK	2013	B	1161	ST-269
27922	M13 240039	UK	2013	B	479	ST-269
27923	M13 240040	UK	2013	B	479	ST-269
27926	M13 240043	UK	2013	B	1195	ST-269
27928	M13 240046	UK	2013	B	275	ST-269
27930	M13 240048	UK	2013	B	1161	ST-269
27931	M13 240051	UK	2013	B	479	ST-269
27932	M13 240054	UK	2013	B	1774	ST-269
27935	M13 240067	UK	2013	B	275	ST-269
27936	M13 240069	UK	2013	B	1161	ST-269
27937	M13 240072	UK	2013	B	269	ST-269
27949	M13 240095	UK	2013	B	1049	ST-269
27955	M13 240112	UK	2013	B	269	ST-269
27959	M13 240121	UK	2013	B	1161	ST-269
27961	M13 240124	UK	2013	B	1161	ST-269
27970	M13 240147	UK	2013	B	10712	ST-269
27975	M13 240160	UK	2013	B	269	ST-269
27977	M13 240164	UK	2013	B	269	ST-269
27979	M13 240167	UK	2013	B	269	ST-269
27982	M13 240172	UK	2013	B	275	ST-269
27989	M13 240191	UK	2013	B	1163	ST-269
27990	M13 240192	UK	2013	B	275	ST-269
27991	M13 240197	UK	2013	B	9829	ST-269
27997	M13 240207	UK	2013	B	1161	ST-269
28001	M13 240213	UK	2013	B	275	ST-269
28005	M13 240227	UK	2013	B	1161	ST-269
28011	M13 240233	UK	2013	B	275	ST-269
28016	M13 240245	UK	2013	B	269	ST-269
28020	M13 240255	UK	2013	B	1161	ST-269
28021	M13 240256	UK	2013	B	1163	ST-269
28022	M13 240257	UK	2013	B	1273	ST-269
28031	M13 240274	UK	2013	B	1049	ST-269
28035	M13 240289	UK	2013	B	10720	ST-269
28037	M13 240294	UK	2013	B	6791	ST-269
28042	M13 240400	UK	2013	B	269	ST-269
28045	M13 240411	UK	2013	B	283	ST-269
28050	M13 240421	UK	2013	B	1049	ST-269
28051	M13 240422	UK	2013	B	1163	ST-269
28055	M13 240428	UK	2013	B	275	ST-269
28056	M13 240429	UK	2013	B	269	ST-269
28062	M13 240450	UK	2013	B	1161	ST-269
28065	M13 240453	UK	2013	B	269	ST-269
28066	M13 240455	UK	2013	B	275	ST-269
28069	M13 240463	UK	2013	B	1161	ST-269
28070	M13 240466	UK	2013	B	275	ST-269
28074	M13 240476	UK	2013	B	1161	ST-269
28075	M13 240478	UK	2013	B	1161	ST-269
28078	M13 240483	UK	2013	B	10724	ST-269
28081	M12 240655	UK	2012	C	467	ST-269
28091	M13 240026	UK	2013	C	467	ST-269
28108	M12 240756	UK	2012	NG	6604	ST-269
34504	M13 240486	UK	2013	B	269	ST-269
34506	M13 240490	UK	2013	B	5972	ST-269
34509	M13 240499	UK	2013	B	1855	ST-269
34514	M13 240508	UK	2013	B	1214	ST-269
35227	09.1126.Y	UK	2009	B	1161	ST-269
35229	09.1211.Y	UK	2009	B	275	ST-269
35237	09.1514.A	UK	2009	B	275	ST-269
35243	09.1858.V	UK	2009	B	269	ST-269
35244	09.1893.P	UK	2009	B	269	ST-269
35256	09.2622.N	UK	2009	B	479	ST-269
[truncated: 1,568 more rows]
